# Supplementary material
Source: PubMed Central journal article supplement (PMC2801773)
Supplement: NIHMS161023-supplement-supplemental1.pdf [file NIHMS161023-supplement-supplemental1.pdf]

Supplemental Fig 1.

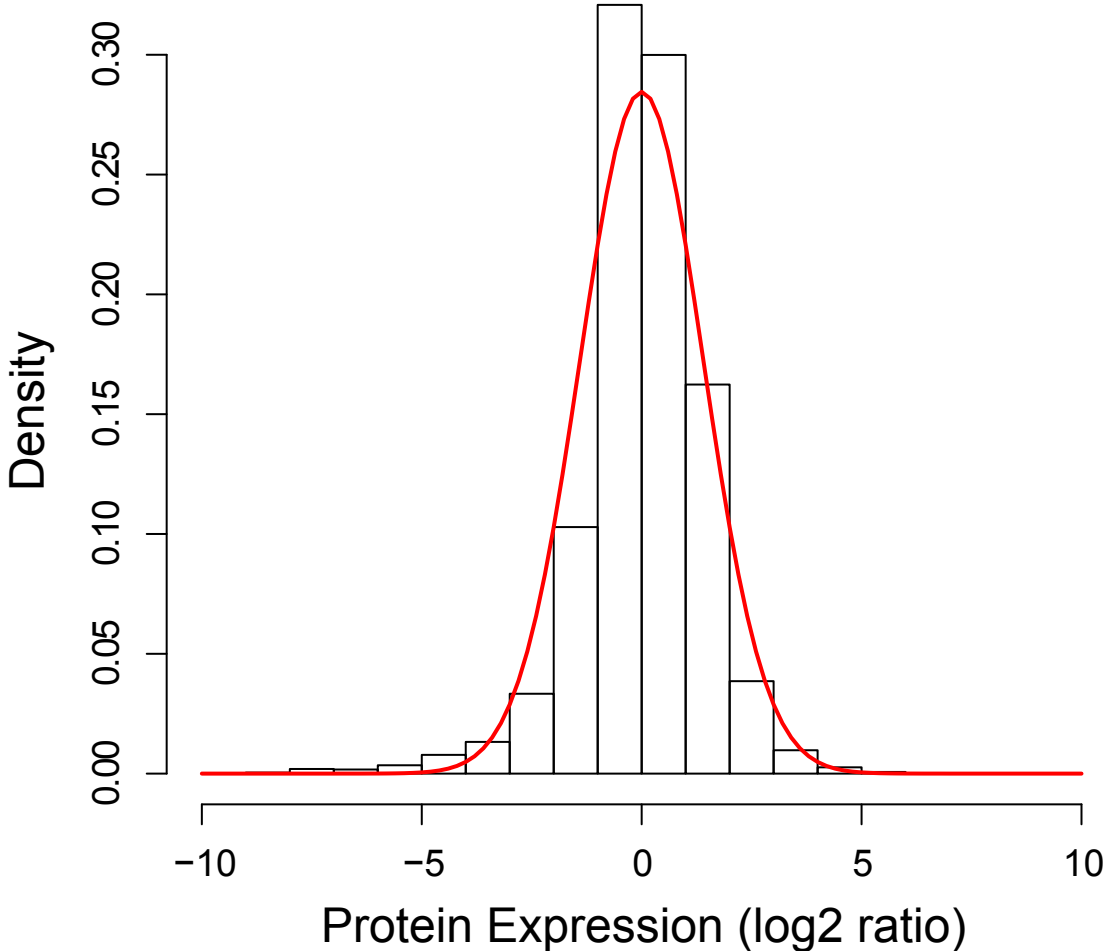

**Supplemental Fig 1.** The protein expression ratios (log2 transformed) between 4+ tumor and 1- tumor are in a normal distribution.

## Supplemental Fig 2.

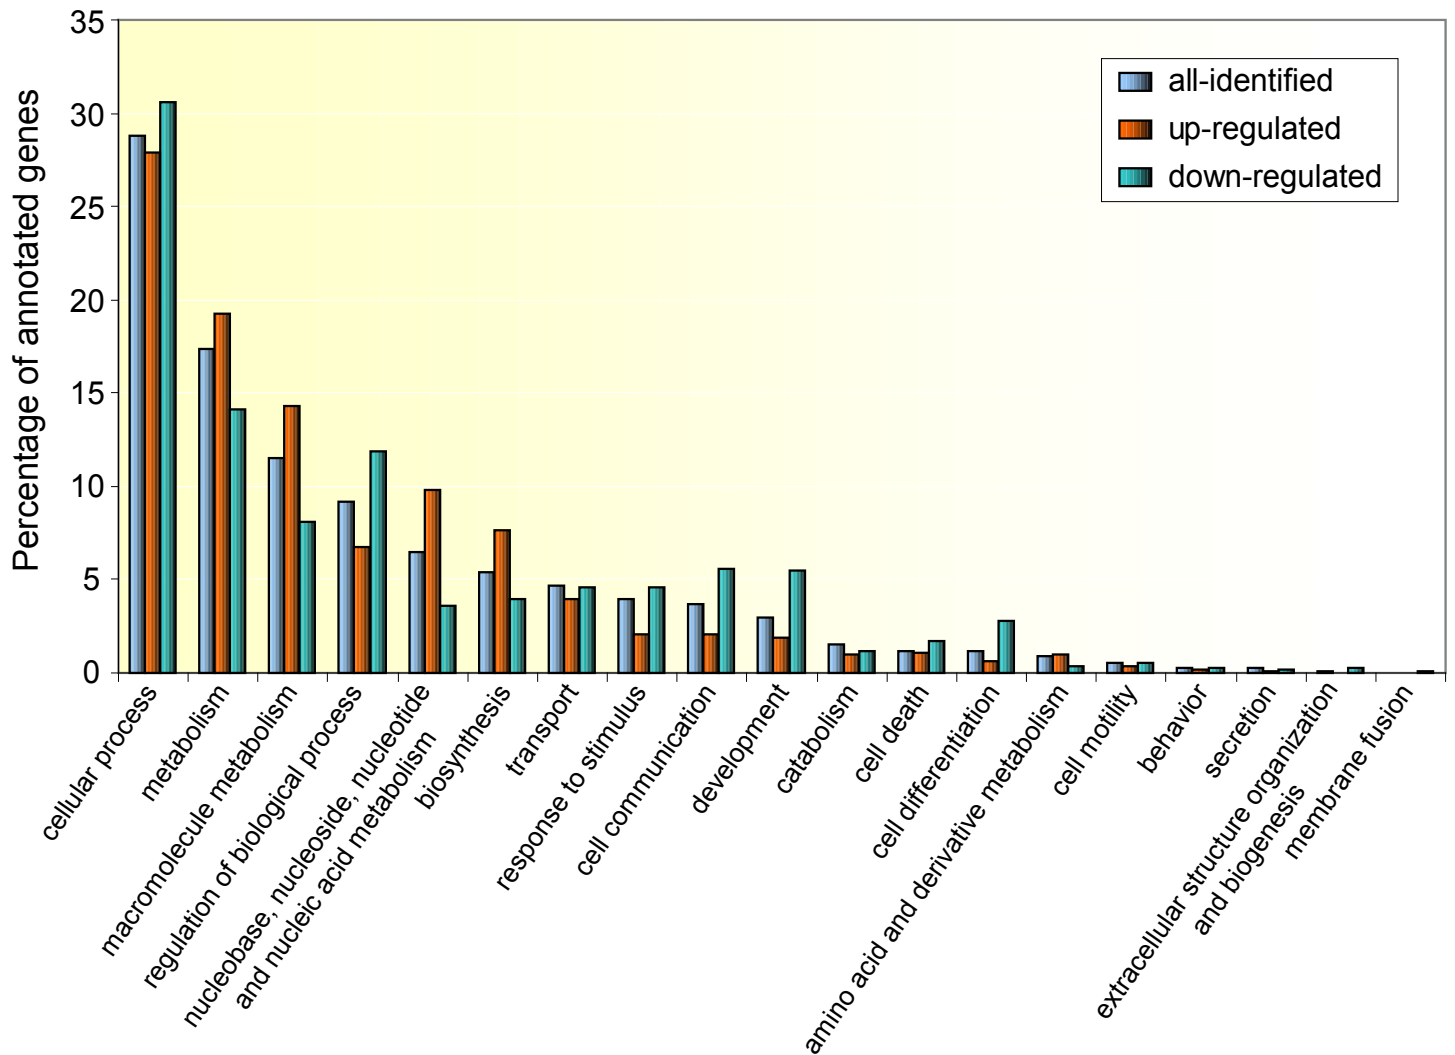

**Supplemental Fig 2.** GO functional categories of the identified proteins in low and high-risk neuroblastoma. GO functional categories of all ICAT identified proteins as well as different expressed proteins in 4+ and 1- tumors are represented by GOSlim terms, which are a subset of GO and provide a higher level of annotation than the standard GO. Cellular process, metabolism, biosynthesis, regulation of biological processes are high in both up- and down-regulated protein groups. The processes involved in development, cell differentiation, cell death, and cell communication are relatively high in down-regulated protein group.

**Supplemental Table 1. Additional Neuroblastoma Tumor Sample Information**

|              | <b>AgeAtDiagnosis</b> | <b>Stage</b> | <b>MYCN_Status</b> | <b>Survival</b> | <b>Source</b> | <b>TestingType</b> |
|--------------|-----------------------|--------------|--------------------|-----------------|---------------|--------------------|
| <b>NB110</b> | 0.11 yrs              | 1            | not amp            | Alive           | DZNSG         | ICAT               |
| <b>NB108</b> | 5.56 yrs              | 1            | not amp            | Alive           | DZNSG         | Western Blot       |
| <b>NB109</b> | 0 yrs                 | 1            | not amp            | Alive           | DZNSG         | Western Blot       |
| <b>NB111</b> | 3.74 yrs              | 1            | not amp            | Alive           | DZNSG         | Western Blot       |
| <b>NB112</b> | 0.5 yrs               | 1            | not amp            | Alive           | DZNSG         | Western Blot       |
| <b>NB113</b> | 11.22 yrs             | 1            | not amp            | Alive           | DZNSG         | Western Blot       |
| <b>NB103</b> | 1.56 yrs              | 4            | amp                | Dead            | DZNSG         | ICAT               |
| <b>NB535</b> | 1.04 yrs              | 4            | amp                | Dead            | CHTN          | Western Blot       |
| <b>NB545</b> | 3.36 yrs              | 4            | amp                | Dead            | CHTN          | Western Blot       |
| <b>NB547</b> | 1.54 yrs              | 4            | amp                | Dead            | CHTN          | Western Blot       |
| <b>NB561</b> | 0.55 yrs              | 4            | amp                | Dead            | CHTN          | Western Blot       |
| <b>NB581</b> | 1.58 yrs              | 4            | amp                | Dead            | CHTN          | Western Blot       |

Note: DZNSG: German Cancer Research Center, CHTN: Cooperative Human Tissue Network

**Supplemental Table 2: GSEA analysis of protein expression changes in neuroblastoma**

|                                              | NAME                               | SIZE                             | ES    | NES   | NOM p-val | FDR q-val |       |
|----------------------------------------------|------------------------------------|----------------------------------|-------|-------|-----------|-----------|-------|
| <b>Up-regulated in 4+ tumor</b>              | MYC_TARGETS                        | 17                               | 0.77  | 2.10  | 0.000     | 0.000     |       |
|                                              | RIBOSOMAL_PROTEINS                 | 30                               | 0.67  | 2.06  | 0.000     | 0.001     |       |
|                                              | HSA03010_RIBOSOME                  | 24                               | 0.70  | 2.04  | 0.000     | 0.001     |       |
|                                              | ADIP_DIFF_CLUSTER4                 | 15                               | 0.71  | 1.87  | 0.000     | 0.009     |       |
|                                              | ELECTRON_TRANSPORT_CHAIN           | 22                               | 0.65  | 1.85  | 0.001     | 0.009     |       |
|                                              | HUMAN_MITODB_6_2002                | 77                               | 0.52  | 1.87  | 0.000     | 0.010     |       |
|                                              | HDACI_COLON_BUT12HRS_DN            | 20                               | 0.64  | 1.82  | 0.000     | 0.013     |       |
|                                              | HDACI_COLON_BUT_DN                 | 45                               | 0.54  | 1.78  | 0.000     | 0.021     |       |
|                                              | HDACI_COLON_BUT48HRS_DN            | 19                               | 0.63  | 1.78  | 0.001     | 0.021     |       |
|                                              | HSA00190_OXIDATIVE_PHOSPHORYLATION | 22                               | 0.61  | 1.75  | 0.000     | 0.024     |       |
|                                              | MRNA_SPLICING                      | 16                               | 0.65  | 1.76  | 0.005     | 0.025     |       |
|                                              | MANALO_HYPOXIA_DN                  | 26                               | 0.58  | 1.71  | 0.001     | 0.041     |       |
|                                              | HDACI_COLON_BUT16HRS_DN            | 21                               | 0.59  | 1.69  | 0.005     | 0.044     |       |
|                                              | POD1_KO_UP                         | 75                               | 0.47  | 1.69  | 0.001     | 0.046     |       |
|                                              | PRMT5_KD_UP                        | 48                               | 0.50  | 1.67  | 0.002     | 0.048     |       |
|                                              | MOOTHA_VOXPPOS                     | 15                               | 0.64  | 1.68  | 0.008     | 0.048     |       |
|                                              | UVB_NHEK2_UP                       | 20                               | 0.60  | 1.67  | 0.005     | 0.050     |       |
|                                              | STEMCELL_EMBRYONIC_UP              | 264                              | 0.41  | 1.66  | 0.000     | 0.052     |       |
|                                              | MITOCHONDRIA                       | 81                               | 0.45  | 1.65  | 0.002     | 0.057     |       |
|                                              | STEMCELL_NEURAL_UP                 | 388                              | 0.40  | 1.63  | 0.000     | 0.064     |       |
|                                              | VHL_NORMAL_UP                      | 76                               | 0.45  | 1.62  | 0.001     | 0.067     |       |
|                                              | BHATTACHARYA_ESC_UP                | 18                               | 0.59  | 1.61  | 0.010     | 0.073     |       |
|                                              | BRCA_PROGNOSIS_NEG                 | 17                               | 0.59  | 1.60  | 0.015     | 0.082     |       |
|                                              | HSA04110_CELL_CYCLE                | 18                               | 0.57  | 1.58  | 0.021     | 0.091     |       |
|                                              | MRNA_PROCESSING_REACTOME           | 33                               | 0.49  | 1.57  | 0.017     | 0.094     |       |
|                                              | <b>Down-regulated in 4+ tumor</b>  | HSA04514_CELL_ADHESION_MOLECULES | 18    | -0.71 | -2.30     | 0.000     | 0.001 |
|                                              |                                    | HSA04360_AXON_GUIDANCE           | 24    | -0.65 | -2.33     | 0.000     | 0.003 |
| BRENTANI_CELL_ADHESION                       |                                    | 20                               | -0.64 | -2.18 | 0.000     | 0.004     |       |
| CELL_ADHESION_MOLECULE_ACTIVITY              |                                    | 25                               | -0.55 | -2.05 | 0.000     | 0.012     |       |
| CELL_ADHESION                                |                                    | 29                               | -0.50 | -1.97 | 0.000     | 0.020     |       |
| HSA04610_COMPLEMENT_AND_COAGULATION_CASCADES |                                    | 38                               | -0.48 | -1.95 | 0.006     | 0.020     |       |
| AGEING_BRAIN_UP                              |                                    | 34                               | -0.48 | -1.89 | 0.000     | 0.023     |       |
| CALCIUM_REGULATION_IN_CARDIAC_CELLS          |                                    | 22                               | -0.54 | -1.90 | 0.000     | 0.024     |       |
| SMOOTH_MUSCLE_CONTRACTION                    |                                    | 20                               | -0.50 | -1.76 | 0.009     | 0.055     |       |
| AGEING_KIDNEY_UP                             |                                    | 51                               | -0.39 | -1.72 | 0.007     | 0.064     |       |
| HSC_MATURE_ADULT                             |                                    | 38                               | -0.41 | -1.69 | 0.017     | 0.072     |       |

Supplemental Table 3. GSEA details for the leading edge subset of proteins in up-regulated gene set STEMCELL\_NEURAL\_UP

| GENE SYMBOL | GENE TITLE                                                                                  | RANK IN GENE LIST | RANK METRIC SCORE | RUNNING ES | CORE ENRICHMENT |
|-------------|---------------------------------------------------------------------------------------------|-------------------|-------------------|------------|-----------------|
| ARFRP1      | ADP-ribosylation factor related protein 1                                                   | 4                 | 3.65              | 0.01       | Yes             |
| SSRP1       | structure specific recognition protein 1                                                    | 5                 | 3.54              | 0.02       | Yes             |
| MCM2        | MCM2 minichromosome maintenance deficient 2, mitotin (S. cerevisiae)                        | 11                | 3.30              | 0.02       | Yes             |
| TRIO        | triple functional domain (TPRF interacting)                                                 | 20                | 3.16              | 0.02       | Yes             |
| FBL         | fibrillarin                                                                                 | 21                | 3.09              | 0.03       | Yes             |
| RPS28       | ribosomal protein S28                                                                       | 22                | 3.06              | 0.04       | Yes             |
| HSPD1       | heat shock 60kDa protein 1 (chaperonin)                                                     | 23                | 3.04              | 0.04       | Yes             |
| HMGB2       | high-mobility group box 2                                                                   | 25                | 2.99              | 0.05       | Yes             |
| MCM5        | MCM5 minichromosome maintenance deficient 5, cell division cycle 46 (S. cerevisiae)         | 27                | 2.91              | 0.06       | Yes             |
| DTYMK       | deoxythymidylate kinase (thymidylate kinase)                                                | 30                | 2.86              | 0.06       | Yes             |
| DDX21       | DEAD (Asp-Glu-Ala-Asp) box polypeptide 21                                                   | 33                | 2.75              | 0.07       | Yes             |
| NDUFAB1     | NADH dehydrogenase (ubiquinone) 1, alpha/beta subcomplex, 1, 8kDa                           | 34                | 2.75              | 0.08       | Yes             |
| PRPS2       | phosphoribosyl pyrophosphate synthetase 2                                                   | 35                | 2.67              | 0.08       | Yes             |
| SMC4        | structural maintenance of chromosomes 4                                                     | 36                | 2.64              | 0.09       | Yes             |
| TBC1D15     | TBC1 domain family, member 15                                                               | 43                | 2.54              | 0.09       | Yes             |
| WDHD1       | WD repeat and HMG-box DNA binding protein 1                                                 | 48                | 2.48              | 0.09       | Yes             |
| PPA2        | pyrophosphatase (inorganic) 2                                                               | 49                | 2.45              | 0.10       | Yes             |
| DDX18       | DEAD (Asp-Glu-Ala-Asp) box polypeptide 18                                                   | 51                | 2.43              | 0.11       | Yes             |
| SART1       | squamous cell carcinoma antigen recognised by T cells                                       | 53                | 2.41              | 0.11       | Yes             |
| RPL10A      | ribosomal protein L10a                                                                      | 55                | 2.38              | 0.12       | Yes             |
| PSMA7       | proteasome (prosome, macropain) subunit, alpha type, 7                                      | 57                | 2.36              | 0.12       | Yes             |
| HMGB1       | high-mobility group box 1                                                                   | 63                | 2.30              | 0.12       | Yes             |
| NOLA2       | nucleolar protein family A, member 2 (H/ACA small nucleolar RNPs)                           | 67                | 2.28              | 0.13       | Yes             |
| TMPO        | thymopoietin                                                                                | 69                | 2.26              | 0.13       | Yes             |
| LRRC59      | leucine rich repeat containing 59                                                           | 70                | 2.25              | 0.14       | Yes             |
| RAD21       | RAD21 homolog (S. pombe)                                                                    | 74                | 2.20              | 0.14       | Yes             |
| HSPA14      | heat shock 70kDa protein 14                                                                 | 75                | 2.20              | 0.15       | Yes             |
| SCARB2      | scavenger receptor class B, member 2                                                        | 77                | 2.19              | 0.15       | Yes             |
| GNPNAT1     | glucosamine-phosphate N-acetyltransferase 1                                                 | 79                | 2.18              | 0.15       | Yes             |
| RRM1        | ribonucleotide reductase M1 polypeptide                                                     | 81                | 2.16              | 0.16       | Yes             |
| PB1         | -                                                                                           | 85                | 2.13              | 0.16       | Yes             |
| PKM2        | pyruvate kinase, muscle                                                                     | 86                | 2.12              | 0.17       | Yes             |
| NUP93       | nucleoporin 93kDa                                                                           | 88                | 2.11              | 0.17       | Yes             |
| UHRF1       | ubiquitin-like, containing PHD and RING finger domains, 1                                   | 89                | 2.11              | 0.18       | Yes             |
| PP1B        | peptidylprolyl isomerase B (cyclophilin B)                                                  | 90                | 2.10              | 0.18       | Yes             |
| MTCH2       | mitochondrial carrier homolog 2 (C. elegans)                                                | 94                | 2.06              | 0.19       | Yes             |
| CBX5        | chromobox homolog 5 (HP1 alpha homolog, Drosophila)                                         | 102               | 2.04              | 0.18       | Yes             |
| APEX1       | APEX nuclease (multifunctional DNA repair enzyme) 1                                         | 109               | 2.01              | 0.18       | Yes             |
| CKMT2       | creatine kinase, mitochondrial 2 (sarcomeric)                                               | 111               | 2.00              | 0.19       | Yes             |
| NMD3        | NMD3 homolog (S. cerevisiae)                                                                | 114               | 1.98              | 0.19       | Yes             |
| CNN3        | calponin 3, acidic                                                                          | 116               | 1.97              | 0.20       | Yes             |
| PPA1        | pyrophosphatase (inorganic) 1                                                               | 130               | 1.86              | 0.19       | Yes             |
| CNBP        | CCHC-type zinc finger, nucleic acid binding protein                                         | 131               | 1.86              | 0.19       | Yes             |
| NPM1        | nucleophosmin (nucleolar phosphoprotein B23, numatrin)                                      | 133               | 1.85              | 0.20       | Yes             |
| GRWD1       | glutamate-rich WD repeat containing 1                                                       | 147               | 1.80              | 0.19       | Yes             |
| DEK         | DEK oncogene (DNA binding)                                                                  | 148               | 1.78              | 0.20       | Yes             |
| MCM4        | MCM4 minichromosome maintenance deficient 4 (S. cerevisiae)                                 | 149               | 1.78              | 0.20       | Yes             |
| ABCE1       | ATP-binding cassette, sub-family E (OABP), member 1                                         | 152               | 1.76              | 0.20       | Yes             |
| JAM3        | junctional adhesion molecule 3                                                              | 156               | 1.75              | 0.20       | Yes             |
| NDUFV1      | NADH dehydrogenase (ubiquinone) flavoprotein 1, 51kDa                                       | 160               | 1.73              | 0.21       | Yes             |
| GLUD1       | glutamate dehydrogenase 1                                                                   | 162               | 1.73              | 0.21       | Yes             |
| CACYBP      | calyculin binding protein                                                                   | 163               | 1.72              | 0.21       | Yes             |
| TSFM        | Ts translation elongation factor, mitochondrial                                             | 172               | 1.68              | 0.21       | Yes             |
| DECR1       | 2,4-dienoyl CoA reductase 1, mitochondrial                                                  | 179               | 1.65              | 0.21       | Yes             |
| RSL1D1      | ribosomal L1 domain containing 1                                                            | 192               | 1.60              | 0.20       | Yes             |
| ACTL6A      | actin-like 6A                                                                               | 194               | 1.59              | 0.21       | Yes             |
| FHL1        | four and a half LIM domains 1                                                               | 195               | 1.59              | 0.21       | Yes             |
| OXCT1       | 3-oxoacid CoA transferase 1                                                                 | 206               | 1.55              | 0.20       | Yes             |
| DOCK7       | dedicator of cytokinesis 7                                                                  | 208               | 1.54              | 0.21       | Yes             |
| DDX3X       | DEAD (Asp-Glu-Ala-Asp) box polypeptide 3, X-linked                                          | 210               | 1.54              | 0.21       | Yes             |
| ASNS        | asparagine synthetase                                                                       | 211               | 1.53              | 0.22       | Yes             |
| SFRS1       | splicing factor, arginine/serine-rich 1 (splicing factor 2, alternate splicing factor)      | 214               | 1.52              | 0.22       | Yes             |
| WDR5        | WD repeat domain 5                                                                          | 216               | 1.52              | 0.22       | Yes             |
| RBBP4       | retinoblastoma binding protein 4                                                            | 220               | 1.51              | 0.22       | Yes             |
| H2AFY       | H2A histone family, member Y                                                                | 222               | 1.50              | 0.22       | Yes             |
| RRM2        | ribonucleotide reductase M2 polypeptide                                                     | 226               | 1.47              | 0.23       | Yes             |
| PABPC1      | poly(A) binding protein, cytoplasmic 1                                                      | 229               | 1.46              | 0.23       | Yes             |
| SLC25A5     | solute carrier family 25 (mitochondrial carrier; adenine nucleotide translocator), member 5 | 231               | 1.46              | 0.23       | Yes             |
| AKAP12      | A kinase (PRKA) anchor protein (gravin) 12                                                  | 232               | 1.46              | 0.23       | Yes             |
| TCEA1       | transcription elongation factor A (SII), 1                                                  | 236               | 1.45              | 0.24       | Yes             |
| NIT2        | nitrilase family, member 2                                                                  | 239               | 1.44              | 0.24       | Yes             |
| AQR         | aquarius homolog (mouse)                                                                    | 241               | 1.43              | 0.24       | Yes             |
| KARS        | lysyl-tRNA synthetase                                                                       | 242               | 1.43              | 0.24       | Yes             |
| EFTUD2      | elongation factor Tu GTP binding domain containing 2                                        | 244               | 1.42              | 0.25       | Yes             |
| EFTUD1      | elongation factor Tu GTP binding domain containing 1                                        | 246               | 1.42              | 0.25       | Yes             |
| SYNCRIP     | synaptotagmin binding, cytoplasmic RNA interacting protein                                  | 248               | 1.42              | 0.25       | Yes             |
| LAMA5       | laminin, alpha 5                                                                            | 259               | 1.38              | 0.25       | Yes             |
| SFRS7       | splicing factor, arginine/serine-rich 7, 35kDa                                              | 261               | 1.37              | 0.25       | Yes             |
| TOMM70A     | translocase of outer mitochondrial membrane 70 homolog A (S. cerevisiae)                    | 263               | 1.36              | 0.25       | Yes             |
| GNPDA1      | glucosamine-6-phosphate deaminase 1                                                         | 266               | 1.35              | 0.25       | Yes             |
| GTPBP4      | GTP binding protein 4                                                                       | 272               | 1.35              | 0.25       | Yes             |
| XRCC1       | X-ray repair complementing defective repair in Chinese hamster cells 1                      | 273               | 1.34              | 0.26       | Yes             |
| TXN         | thioredoxin                                                                                 | 278               | 1.34              | 0.26       | Yes             |
| PGK1        | phosphoglycerate kinase 1                                                                   | 279               | 1.33              | 0.26       | Yes             |
| TM9SF2      | transmembrane 9 superfamily member 2                                                        | 281               | 1.32              | 0.26       | Yes             |
| LAP3        | leucine aminopeptidase 3                                                                    | 283               | 1.32              | 0.26       | Yes             |
| BAG2        | BCL2-associated athanogene 2                                                                | 286               | 1.31              | 0.27       | Yes             |
| VDAC3       | voltage-dependent anion channel 3                                                           | 289               | 1.31              | 0.27       | Yes             |
| NKRF        | NF-kappaB repressing factor                                                                 | 291               | 1.30              | 0.27       | Yes             |
| FUBP1       | far upstream element (FUSE) binding protein 1                                               | 303               | 1.28              | 0.26       | Yes             |
| PHF5A       | PHD finger protein 5A                                                                       | 307               | 1.27              | 0.26       | Yes             |
| RBM39       | RNA binding motif protein 39                                                                | 310               | 1.27              | 0.26       | Yes             |
| TUFM        | Tu translation elongation factor, mitochondrial                                             | 311               | 1.26              | 0.27       | Yes             |
| PSMB1       | proteasome (prosome, macropain) subunit, beta type, 1                                       | 313               | 1.26              | 0.27       | Yes             |
| EXOSC7      | exosome component 7                                                                         | 314               | 1.25              | 0.27       | Yes             |
| EEF2        | eukaryotic translation elongation factor 2                                                  | 317               | 1.25              | 0.27       | Yes             |

|            |                                                                                             |     |      |      |     |
|------------|---------------------------------------------------------------------------------------------|-----|------|------|-----|
| RANBP5     | RAN binding protein 5                                                                       | 318 | 1.25 | 0.28 | Yes |
| PDIA3      | protein disulfide isomerase family A, member 3                                              | 320 | 1.24 | 0.28 | Yes |
| RECQL      | RecQ protein-like (DNA helicase Q1-like)                                                    | 322 | 1.23 | 0.28 | Yes |
| NDUF51     | NADH dehydrogenase (ubiquinone) Fe-S protein 1, 75kDa (NADH-coenzyme Q reductase)           | 323 | 1.22 | 0.29 | Yes |
| NASP       | nuclear autoantigenic sperm protein (histone-binding)                                       | 330 | 1.21 | 0.28 | Yes |
| ANP32E     | acidic (leucine-rich) nuclear phosphoprotein 32 family, member E                            | 331 | 1.21 | 0.29 | Yes |
| NOP5/NOP58 | -                                                                                           | 332 | 1.21 | 0.29 | Yes |
| TNPO1      | transportin 1                                                                               | 333 | 1.21 | 0.29 | Yes |
| VBP1       | von Hippel-Lindau binding protein 1                                                         | 334 | 1.21 | 0.30 | Yes |
| PSMA6      | proteasome (prosome, macropain) subunit, alpha type, 6                                      | 337 | 1.20 | 0.30 | Yes |
| SRPRB      | signal recognition particle receptor, B subunit                                             | 338 | 1.20 | 0.30 | Yes |
| MAT2A      | methionine adenosyltransferase II, alpha                                                    | 339 | 1.20 | 0.30 | Yes |
| SRP19      | signal recognition particle 19kDa                                                           | 340 | 1.20 | 0.31 | Yes |
| ANP32A     | acidic (leucine-rich) nuclear phosphoprotein 32 family, member A                            | 348 | 1.18 | 0.30 | Yes |
| DC2        | -                                                                                           | 352 | 1.18 | 0.30 | Yes |
| SFPQ       | splicing factor proline/glutamine-rich (polypyrimidine tract binding protein associated)    | 354 | 1.17 | 0.31 | Yes |
| EIF2S1     | eukaryotic translation initiation factor 2, subunit 1 alpha, 35kDa                          | 364 | 1.15 | 0.30 | Yes |
| PRPF4B     | PRP4 pre-mRNA processing factor 4 homolog B (yeast)                                         | 366 | 1.15 | 0.30 | Yes |
| PTN        | pleiotrophin (heparin binding growth factor 8, neurite growth-promoting factor 1)           | 367 | 1.15 | 0.31 | Yes |
| NONO       | non-POU domain containing, octamer-binding                                                  | 370 | 1.14 | 0.31 | Yes |
| SAFB       | scaffold attachment factor B                                                                | 372 | 1.13 | 0.31 | Yes |
| TKT        | transketolase (Wernicke-Korsakoff syndrome)                                                 | 373 | 1.13 | 0.31 | Yes |
| P4HB       | procollagen-proline, 2-oxoglutarate 4-dioxygenase (proline 4-hydroxylase), beta polypeptide | 377 | 1.12 | 0.31 | Yes |
| PPP5C      | protein phosphatase 5, catalytic subunit                                                    | 378 | 1.12 | 0.31 | Yes |
| SDHA       | succinate dehydrogenase complex, subunit A, flavoprotein (Fp)                               | 383 | 1.12 | 0.31 | Yes |
| PPP4R2     | protein phosphatase 4, regulatory subunit 2                                                 | 384 | 1.12 | 0.32 | Yes |
| HNRPA2B1   | heterogeneous nuclear ribonucleoprotein A2/B1                                               | 385 | 1.12 | 0.32 | Yes |
| STT3A      | STT3, subunit of the oligosaccharyltransferase complex, homolog A ( <i>S. cerevisiae</i> )  | 387 | 1.11 | 0.32 | Yes |
| EIF3S9     | eukaryotic translation initiation factor 3, subunit 9 eta, 116kDa                           | 389 | 1.11 | 0.32 | Yes |
| CRYZ       | crystallin, zeta (quinone reductase)                                                        | 390 | 1.11 | 0.33 | Yes |
| XRCC6      | X-ray repair complementing defective repair in Chinese hamster cells 6 (Ku autoantigen, 71  | 393 | 1.10 | 0.33 | Yes |
| EIF2S3     | eukaryotic translation initiation factor 2, subunit 3 gamma, 52kDa                          | 397 | 1.09 | 0.33 | Yes |
| ETFA       | electron-transfer-flavoprotein, alpha polypeptide (glutaric aciduria II)                    | 402 | 1.08 | 0.33 | Yes |
| PDHA1      | pyruvate dehydrogenase (lipoamide) alpha 1                                                  | 403 | 1.08 | 0.33 | Yes |
| MTX2       | metaxin 2                                                                                   | 405 | 1.07 | 0.33 | Yes |
| GABPA      | GA binding protein transcription factor, alpha subunit 60kDa                                | 411 | 1.06 | 0.33 | Yes |
| SR140      | -                                                                                           | 420 | 1.05 | 0.32 | Yes |
| PA2G4      | proliferation-associated 2G4, 38kDa                                                         | 425 | 1.04 | 0.32 | Yes |
| HNRPM      | heterogeneous nuclear ribonucleoprotein M                                                   | 431 | 1.03 | 0.32 | Yes |
| CPSF2      | cleavage and polyadenylation specific factor 2, 100kDa                                      | 432 | 1.03 | 0.32 | Yes |
| RANBP1     | RAN binding protein 1                                                                       | 433 | 1.03 | 0.33 | Yes |
| IMPDH2     | IMP (inosine monophosphate) dehydrogenase 2                                                 | 435 | 1.02 | 0.33 | Yes |
| HINT1      | histidine triad nucleotide binding protein 1                                                | 438 | 1.02 | 0.33 | Yes |
| AP1G1      | adaptor-related protein complex 1, gamma 1 subunit                                          | 442 | 1.00 | 0.33 | Yes |
| AHCY       | S-adenosylhomocysteine hydrolase                                                            | 443 | 1.00 | 0.33 | Yes |
| PRPS1      | phosphoribosyl pyrophosphate synthetase 1                                                   | 444 | 1.00 | 0.33 | Yes |
| HTATSF1    | HIV-1 Tat specific factor 1                                                                 | 445 | 1.00 | 0.34 | Yes |
| MCM7       | MCM7 minichromosome maintenance deficient 7 ( <i>S. cerevisiae</i> )                        | 447 | 0.99 | 0.34 | Yes |
| TARDBP     | TAR DNA binding protein                                                                     | 448 | 0.99 | 0.34 | Yes |
| TM9SF3     | transmembrane 9 superfamily member 3                                                        | 449 | 0.99 | 0.34 | Yes |
| CAD        | carbamoyl-phosphate synthetase 2, aspartate transcarbamylase, and dihydroorotase            | 451 | 0.98 | 0.35 | Yes |
| SF3B1      | splicing factor 3b, subunit 1, 155kDa                                                       | 453 | 0.98 | 0.35 | Yes |
| TCERG1     | transcription elongation regulator 1                                                        | 455 | 0.97 | 0.35 | Yes |
| SHMT1      | serine hydroxymethyltransferase 1 (soluble)                                                 | 461 | 0.96 | 0.35 | Yes |
| HNRPH1     | heterogeneous nuclear ribonucleoprotein H1 (H)                                              | 464 | 0.96 | 0.35 | Yes |
| LRPPRC     | leucine-rich PPR-motif containing                                                           | 466 | 0.96 | 0.35 | Yes |
| VPS29      | vacuolar protein sorting 29 (yeast)                                                         | 467 | 0.96 | 0.35 | Yes |
| CHORDC1    | cysteine and histidine-rich domain (CHORD)-containing 1                                     | 469 | 0.96 | 0.35 | Yes |
| CYC1       | cytochrome c-1                                                                              | 471 | 0.95 | 0.35 | Yes |
| DLD        | dihydrolipoamide dehydrogenase                                                              | 475 | 0.94 | 0.35 | Yes |
| NUDT5      | nudix (nucleoside diphosphate linked moiety X)-type motif 5                                 | 478 | 0.94 | 0.36 | Yes |
| UBE1C      | ubiquitin-activating enzyme E1C (UBA3 homolog, yeast)                                       | 480 | 0.94 | 0.36 | Yes |
| ARIH2      | ariadne homolog 2 ( <i>Drosophila</i> )                                                     | 482 | 0.93 | 0.36 | Yes |
| SAE1       | -                                                                                           | 483 | 0.93 | 0.36 | Yes |
| DLAT       | dihydrolipoamide S-acetyltransferase (E2 component of pyruvate dehydrogenase complex)       | 486 | 0.92 | 0.36 | Yes |
| MRPL3      | mitochondrial ribosomal protein L3                                                          | 488 | 0.92 | 0.36 | Yes |
| XPO1       | exportin 1 (CRM1 homolog, yeast)                                                            | 491 | 0.91 | 0.36 | Yes |
| RHOA       | ras homolog gene family, member A                                                           | 492 | 0.90 | 0.37 | Yes |
| CRKL       | v-erk sarcoma virus CT10 oncogene homolog (avian)-like                                      | 493 | 0.90 | 0.37 | Yes |
| PPID       | peptidylprolyl isomerase D (cyclophilin D)                                                  | 494 | 0.90 | 0.37 | Yes |
| SEC24B     | SEC24 related gene family, member B ( <i>S. cerevisiae</i> )                                | 495 | 0.90 | 0.37 | Yes |
| CSTF3      | cleavage stimulation factor, 3' pre-RNA, subunit 3, 77kDa                                   | 501 | 0.89 | 0.37 | Yes |
| COPB2      | coatamer protein complex, subunit beta 2 (beta prime)                                       | 502 | 0.89 | 0.37 | Yes |
| CCT5       | chaperonin containing TCP1, subunit 5 (epsilon)                                             | 504 | 0.89 | 0.37 | Yes |
| PDCD6IP    | programmed cell death 6 interacting protein                                                 | 507 | 0.88 | 0.37 | Yes |
| IDH3A      | isocitrate dehydrogenase 3 (NAD+) alpha                                                     | 508 | 0.88 | 0.38 | Yes |
| SEC31A     | SEC31 homolog A ( <i>S. cerevisiae</i> )                                                    | 509 | 0.87 | 0.38 | Yes |
| ERH        | enhancer of rudimentary homolog ( <i>Drosophila</i> )                                       | 514 | 0.87 | 0.38 | Yes |
| CUL4A      | cullin 4A                                                                                   | 515 | 0.87 | 0.38 | Yes |
| SUGT1      | SGT1, suppressor of G2 allele of SKP1 ( <i>S. cerevisiae</i> )                              | 519 | 0.86 | 0.38 | Yes |
| PGLS       | 6-phosphogluconolactonase                                                                   | 520 | 0.86 | 0.38 | Yes |
| XRCC5      | X-ray repair complementing defective repair in Chinese hamster cells 5 (double-strand-bre   | 521 | 0.86 | 0.38 | Yes |
| EIF3S8     | eukaryotic translation initiation factor 3, subunit 8, 110kDa                               | 523 | 0.86 | 0.39 | Yes |
| HNRPK      | heterogeneous nuclear ribonucleoprotein K                                                   | 526 | 0.85 | 0.39 | Yes |
| CSNK2B     | casein kinase 2, beta polypeptide                                                           | 530 | 0.84 | 0.38 | Yes |
| PSPC1      | paraspeckle component 1                                                                     | 532 | 0.84 | 0.39 | Yes |
| IARS       | isoleucine-tRNA synthetase                                                                  | 534 | 0.83 | 0.39 | Yes |
| NUP35      | nucleoporin 35kDa                                                                           | 536 | 0.83 | 0.39 | Yes |
| SMAD2      | SMAD, mothers against DPP homolog 2 ( <i>Drosophila</i> )                                   | 537 | 0.82 | 0.39 | Yes |
| RNASEH2A   | ribonuclease H2, subunit A                                                                  | 549 | 0.81 | 0.38 | Yes |
| CCT8       | chaperonin containing TCP1, subunit 8 (theta)                                               | 552 | 0.80 | 0.38 | Yes |
| MRPS18A    | mitochondrial ribosomal protein S18A                                                        | 554 | 0.80 | 0.38 | Yes |
| STK24      | serine/threonine kinase 24 (STE20 homolog, yeast)                                           | 555 | 0.80 | 0.39 | Yes |
| KPNB1      | karyopherin (importin) beta 1                                                               | 556 | 0.79 | 0.39 | Yes |
| RUVBL2     | RuvB-like 2 ( <i>E. coli</i> )                                                              | 557 | 0.79 | 0.39 | Yes |
| EEF1D      | eukaryotic translation elongation factor 1 delta (guanine nucleotide exchange protein)      | 560 | 0.79 | 0.39 | Yes |
| EIF3S6IP   | eukaryotic translation initiation factor 3, subunit 6 interacting protein                   | 562 | 0.79 | 0.39 | Yes |
| RAN        | RAN, member RAS oncogene family                                                             | 563 | 0.79 | 0.39 | Yes |
| HSPA4      | heat shock 70kDa protein 4                                                                  | 564 | 0.78 | 0.40 | Yes |

Supplemental Table 4: GO analysis of differential expressed proteins in 4+ and 1- neuroblastoma tumor

|                          | Term                                                                                            | Count | PValue   | FDR      |
|--------------------------|-------------------------------------------------------------------------------------------------|-------|----------|----------|
| Up-regulated in 4+ tumor | GO:0006396~RNA processing                                                                       | 52    | 1.67E-20 | 3.20E-19 |
|                          | GO:0022613~ribonucleoprotein complex biogenesis and assembly                                    | 31    | 1.05E-15 | 1.91E-14 |
|                          | GO:0044237~cellular metabolic process                                                           | 271   | 2.98E-15 | 5.74E-14 |
|                          | GO:0006397~mRNA processing                                                                      | 34    | 3.72E-15 | 7.01E-14 |
|                          | GO:0008152~metabolic process                                                                    | 289   | 1.12E-14 | 2.14E-13 |
|                          | GO:0006412~translation                                                                          | 52    | 1.46E-14 | 2.78E-13 |
|                          | GO:0044249~cellular biosynthetic process                                                        | 73    | 2.98E-14 | 5.69E-13 |
|                          | GO:0016071~mRNA metabolic process                                                               | 35    | 1.10E-13 | 2.10E-12 |
|                          | GO:0008380~RNA splicing                                                                         | 30    | 1.57E-13 | 3.00E-12 |
|                          | GO:0010467~gene expression                                                                      | 150   | 8.01E-13 | 1.53E-11 |
|                          | GO:0044238~primary metabolic process                                                            | 264   | 1.65E-12 | 3.15E-11 |
|                          | GO:0043170~macromolecule metabolic process                                                      | 237   | 1.06E-11 | 2.02E-10 |
|                          | GO:0042254~ribosome biogenesis and assembly                                                     | 18    | 4.28E-11 | 8.19E-10 |
|                          | GO:0009059~macromolecule biosynthetic process                                                   | 57    | 6.32E-11 | 1.21E-09 |
|                          | GO:0009058~biosynthetic process                                                                 | 79    | 6.92E-11 | 1.32E-09 |
|                          | GO:0016043~cellular component organization and biogenesis                                       | 116   | 1.03E-10 | 1.97E-09 |
|                          | GO:0000398~nuclear mRNA splicing, via spliceosome                                               | 13    | 1.04E-07 | 1.99E-06 |
|                          | GO:0000377~RNA splicing, via transesterification reactions with bulged adenosine as nucleophile | 13    | 1.04E-07 | 1.99E-06 |
|                          | GO:0000375~RNA splicing, via transesterification reactions                                      | 13    | 1.04E-07 | 1.99E-06 |
|                          | GO:0006996~organelle organization and biogenesis                                                | 59    | 1.56E-07 | 2.98E-06 |
|                          | GO:0006364~rRNA processing                                                                      | 12    | 2.98E-07 | 5.71E-06 |
|                          | GO:0016072~rRNA metabolic process                                                               | 12    | 4.84E-07 | 9.25E-06 |
|                          | GO:0006259~DNA metabolic process                                                                | 46    | 6.06E-07 | 1.16E-05 |
|                          | GO:0006457~protein folding                                                                      | 23    | 8.36E-07 | 1.60E-05 |
|                          | GO:0009987~cellular process                                                                     | 341   | 1.34E-06 | 2.57E-05 |
|                          | GO:0006139~nucleobase, nucleoside, nucleotide and nucleic acid metabolic process                | 137   | 3.55E-06 | 6.79E-05 |
|                          | GO:0044260~cellular macromolecule metabolic process                                             | 122   | 6.65E-06 | 1.27E-04 |
|                          | GO:0006913~nucleocytoplasmic transport                                                          | 15    | 8.44E-06 | 1.61E-04 |
|                          | GO:0044267~cellular protein metabolic process                                                   | 120   | 9.12E-06 | 1.74E-04 |
|                          | GO:0051169~nuclear transport                                                                    | 15    | 9.91E-06 | 1.90E-04 |
|                          | GO:0006144~purine base metabolic process                                                        | 5     | 1.06E-05 | 2.03E-04 |
|                          | GO:0006096~glycolysis                                                                           | 10    | 1.53E-05 | 2.92E-04 |
|                          | GO:0006268~DNA unwinding during replication                                                     | 6     | 1.87E-05 | 3.57E-04 |
|                          | GO:0006605~protein targeting                                                                    | 18    | 2.11E-05 | 4.03E-04 |
|                          | GO:0022618~protein-RNA complex assembly                                                         | 13    | 2.13E-05 | 4.08E-04 |
|                          | GO:0006260~DNA replication                                                                      | 19    | 3.33E-05 | 6.36E-04 |
|                          | GO:0019538~protein metabolic process                                                            | 123   | 3.40E-05 | 6.49E-04 |
|                          | GO:0032392~DNA geometric change                                                                 | 6     | 3.70E-05 | 7.08E-04 |
|                          | GO:0032508~DNA duplex unwinding                                                                 | 6     | 3.70E-05 | 7.08E-04 |
|                          | GO:0006007~glucose catabolic process                                                            | 10    | 5.19E-05 | 9.93E-04 |
|                          | GO:0009113~purine base biosynthetic process                                                     | 4     | 5.32E-05 | 0.001    |
|                          | GO:0006414~translational elongation                                                             | 7     | 5.33E-05 | 0.001    |
|                          | GO:0000245~spliceosome assembly                                                                 | 7     | 7.93E-05 | 0.002    |
|                          | GO:0065003~macromolecular complex assembly                                                      | 30    | 8.13E-05 | 0.002    |
|                          | GO:0042775~organelle ATP synthesis coupled electron transport                                   | 9     | 8.51E-05 | 0.002    |
|                          | GO:0006120~mitochondrial electron transport, NADH to ubiquinone                                 | 8     | 1.16E-04 | 0.002    |
|                          | GO:0006886~intracellular protein transport                                                      | 24    | 1.17E-04 | 0.002    |
|                          | GO:0022607~cellular component assembly                                                          | 31    | 1.22E-04 | 0.002    |
|                          | GO:0015931~nucleobase, nucleoside, nucleotide and nucleic acid transport                        | 11    | 1.38E-04 | 0.003    |
|                          | GO:0019320~hexose catabolic process                                                             | 10    | 1.59E-04 | 0.003    |
|                          | GO:0046365~monosaccharide catabolic process                                                     | 10    | 1.75E-04 | 0.003    |
|                          | GO:0042773~ATP synthesis coupled electron transport                                             | 9     | 1.88E-04 | 0.004    |
|                          | GO:0046164~alcohol catabolic process                                                            | 10    | 2.09E-04 | 0.004    |
|                          | GO:0051276~chromosome organization and biogenesis                                               | 23    | 2.10E-04 | 0.004    |
|                          | GO:0016070~RNA metabolic process                                                                | 101   | 2.30E-04 | 0.004    |
|                          | GO:0006323~DNA packaging                                                                        | 20    | 2.69E-04 | 0.005    |
|                          | GO:0044271~nitrogen compound biosynthetic process                                               | 11    | 2.80E-04 | 0.005    |
|                          | GO:0044275~cellular carbohydrate catabolic process                                              | 11    | 3.02E-04 | 0.006    |
|                          | GO:0008652~amino acid biosynthetic process                                                      | 8     | 3.17E-04 | 0.006    |
|                          | GO:0043284~biopolymer biosynthetic process                                                      | 8     | 4.42E-04 | 0.008    |
|                          | GO:0009112~nucleobase metabolic process                                                         | 5     | 4.65E-04 | 0.009    |
|                          | GO:0046907~intracellular transport                                                              | 33    | 4.85E-04 | 0.009    |
|                          | GO:0016052~carbohydrate catabolic process                                                       | 11    | 4.96E-04 | 0.009    |
|                          | GO:0006325~establishment and/or maintenance of chromatin architecture                           | 19    | 5.95E-04 | 0.011    |
|                          | GO:0009309~amine biosynthetic process                                                           | 9     | 8.15E-04 | 0.015    |
|                          | GO:0009161~ribonucleoside monophosphate metabolic process                                       | 5     | 9.35E-04 | 0.018    |
|                          | GO:0009156~ribonucleoside monophosphate biosynthetic process                                    | 5     | 9.35E-04 | 0.018    |
|                          | GO:0046112~nucleobase biosynthetic process                                                      | 4     | 0.001    | 0.019    |
|                          | GO:0006839~mitochondrial transport                                                              | 7     | 0.001    | 0.020    |
|                          | GO:0045333~cellular respiration                                                                 | 7     | 0.001    | 0.020    |
|                          | GO:0050658~RNA transport                                                                        | 9     | 0.001    | 0.021    |
|                          | GO:0050657~nucleic acid transport                                                               | 9     | 0.001    | 0.021    |
|                          | GO:0051236~establishment of RNA localization                                                    | 9     | 0.001    | 0.021    |
|                          | GO:0009124~nucleoside monophosphate biosynthetic process                                        | 5     | 0.001    | 0.022    |
|                          | GO:0009123~nucleoside monophosphate metabolic process                                           | 5     | 0.001    | 0.022    |
|                          | GO:0017038~protein import                                                                       | 10    | 0.001    | 0.024    |
|                          | GO:0006403~RNA localization                                                                     | 9     | 0.001    | 0.024    |
|                          | GO:0006119~oxidative phosphorylation                                                            | 10    | 0.002    | 0.033    |
|                          | GO:0051641~cellular localization                                                                | 37    | 0.002    | 0.036    |

|                                                                     |     |       |       |
|---------------------------------------------------------------------|-----|-------|-------|
| GO:0033036-macromolecule localization                               | 35  | 0.002 | 0.036 |
| GO:0006006-glucose metabolic process                                | 10  | 0.002 | 0.039 |
| GO:0051649-establishment of cellular localization                   | 36  | 0.002 | 0.041 |
| GO:0007049-cell cycle                                               | 36  | 0.003 | 0.052 |
| GO:0051028-mRNA transport                                           | 8   | 0.003 | 0.052 |
| GO:0009060-aerobic respiration                                      | 6   | 0.003 | 0.052 |
| GO:0043623-cellular protein complex assembly                        | 7   | 0.003 | 0.056 |
| GO:0016568-chromatin modification                                   | 13  | 0.003 | 0.061 |
| GO:0045184-establishment of protein localization                    | 31  | 0.004 | 0.068 |
| GO:0046483-heterocycle metabolic process                            | 8   | 0.004 | 0.073 |
| GO:0009168-purine ribonucleoside monophosphate biosynthetic process | 4   | 0.004 | 0.075 |
| GO:0009167-purine ribonucleoside monophosphate metabolic process    | 4   | 0.004 | 0.075 |
| GO:0009127-purine nucleoside monophosphate biosynthetic process     | 4   | 0.004 | 0.075 |
| GO:0009126-purine nucleoside monophosphate metabolic process        | 4   | 0.004 | 0.075 |
| GO:0006376-mRNA splice site selection                               | 4   | 0.004 | 0.075 |
| GO:0008104-protein localization                                     | 32  | 0.005 | 0.085 |
| GO:0006606-protein import into nucleus                              | 8   | 0.005 | 0.087 |
| GO:0065002-intracellular protein transport across a membrane        | 7   | 0.005 | 0.089 |
| GO:0006261-DNA-dependent DNA replication                            | 9   | 0.005 | 0.089 |
| GO:0006281-DNA repair                                               | 15  | 0.005 | 0.092 |
| GO:0006974-response to DNA damage stimulus                          | 17  | 0.005 | 0.092 |
| GO:0043283-biopolymer metabolic process                             | 153 | 0.005 | 0.093 |
| GO:0015031-protein transport                                        | 29  | 0.005 | 0.095 |
| GO:0051170-nuclear import                                           | 8   | 0.005 | 0.099 |
| GO:0000389-nuclear mRNA 3'-splice site recognition                  | 3   | 0.005 | 0.099 |

| Down-regulated in 4+ tumor                                |    |          |          |
|-----------------------------------------------------------|----|----------|----------|
| GO:0007155-cell adhesion                                  | 23 | 2.58E-07 | 4.94E-06 |
| GO:0022610-biological adhesion                            | 23 | 2.58E-07 | 4.94E-06 |
| GO:0048731-system development                             | 34 | 2.91E-06 | 5.57E-05 |
| GO:0048856-anatomical structure development               | 38 | 4.77E-06 | 9.12E-05 |
| GO:0031175-neurite development                            | 10 | 8.90E-06 | 1.70E-04 |
| GO:0000902-cell morphogenesis                             | 16 | 1.31E-05 | 2.50E-04 |
| GO:0032989-cellular structure morphogenesis               | 16 | 1.31E-05 | 2.50E-04 |
| GO:0007275-multicellular organismal development           | 39 | 1.41E-05 | 2.71E-04 |
| GO:0032990-cell part morphogenesis                        | 11 | 2.21E-05 | 4.23E-04 |
| GO:0030030-cell projection organization and biogenesis    | 11 | 2.21E-05 | 4.23E-04 |
| GO:0048858-cell projection morphogenesis                  | 11 | 2.21E-05 | 4.23E-04 |
| GO:0048812-neurite morphogenesis                          | 9  | 2.66E-05 | 5.09E-04 |
| GO:0048667-neuron morphogenesis during differentiation    | 9  | 2.66E-05 | 5.09E-04 |
| GO:0048666-neuron development                             | 10 | 2.83E-05 | 5.40E-04 |
| GO:0000904-cellular morphogenesis during differentiation  | 9  | 4.46E-05 | 8.53E-04 |
| GO:0032502-developmental process                          | 47 | 4.57E-05 | 8.73E-04 |
| GO:0048699-generation of neurons                          | 11 | 1.26E-04 | 0.002    |
| GO:0007409-axonogenesis                                   | 8  | 1.40E-04 | 0.003    |
| GO:0051258-protein polymerization                         | 6  | 1.98E-04 | 0.004    |
| GO:0030182-neuron differentiation                         | 10 | 2.06E-04 | 0.004    |
| GO:0022008-neurogenesis                                   | 11 | 2.34E-04 | 0.004    |
| GO:0050793-regulation of developmental process            | 10 | 2.67E-04 | 0.005    |
| GO:0009653-anatomical structure morphogenesis             | 22 | 3.07E-04 | 0.006    |
| GO:0048468-cell development                               | 23 | 4.21E-04 | 0.008    |
| GO:0050767-regulation of neurogenesis                     | 5  | 4.41E-04 | 0.008    |
| GO:0007399-nervous system development                     | 17 | 5.87E-04 | 0.011    |
| GO:0042060-wound healing                                  | 7  | 6.48E-04 | 0.012    |
| GO:0032501-multicellular organismal process               | 48 | 7.20E-04 | 0.014    |
| GO:0009611-response to wounding                           | 12 | 7.87E-04 | 0.015    |
| GO:0007010-cytoskeleton organization and biogenesis       | 13 | 0.001    | 0.023    |
| GO:0006066-alcohol metabolic process                      | 10 | 0.001    | 0.024    |
| GO:0007596-blood coagulation                              | 6  | 0.001    | 0.024    |
| GO:0050817-coagulation                                    | 6  | 0.001    | 0.026    |
| GO:0030154-cell differentiation                           | 28 | 0.002    | 0.029    |
| GO:0048869-cellular developmental process                 | 28 | 0.002    | 0.029    |
| GO:0007599-hemostasis                                     | 6  | 0.002    | 0.030    |
| GO:0006869-lipid transport                                | 6  | 0.002    | 0.031    |
| GO:0044275-cellular carbohydrate catabolic process        | 6  | 0.002    | 0.038    |
| GO:0050770-regulation of axonogenesis                     | 4  | 0.002    | 0.041    |
| GO:0042622-cellular carbohydrate metabolic process        | 10 | 0.002    | 0.042    |
| GO:0019318-hexose metabolic process                       | 7  | 0.002    | 0.043    |
| GO:0005996-monosaccharide metabolic process               | 7  | 0.003    | 0.050    |
| GO:0016052-carbohydrate catabolic process                 | 6  | 0.003    | 0.050    |
| GO:0051094-positive regulation of developmental process   | 5  | 0.003    | 0.052    |
| GO:0006007-glucose catabolic process                      | 5  | 0.003    | 0.052    |
| GO:0050878-regulation of body fluid levels                | 6  | 0.003    | 0.062    |
| GO:0048513-organ development                              | 21 | 0.003    | 0.065    |
| GO:0048518-positive regulation of biological process      | 19 | 0.004    | 0.067    |
| GO:0019320-hexose catabolic process                       | 5  | 0.005    | 0.086    |
| GO:0046365-monosaccharide catabolic process               | 5  | 0.005    | 0.089    |
| GO:0065008-regulation of biological quality               | 16 | 0.005    | 0.096    |
| GO:0046164-alcohol catabolic process                      | 5  | 0.005    | 0.097    |
| GO:0016043-cellular component organization and biogenesis | 35 | 0.005    | 0.099    |



Supplemental Table 5: GO analysis of differential expressed genes with correlated mRNA and protein expression

|                          | Term                                                                                            | Count                                                  | PValue   | FDR      |          |
|--------------------------|-------------------------------------------------------------------------------------------------|--------------------------------------------------------|----------|----------|----------|
| Up-regulated in 4+ tumor | GO:0006396-RNA processing                                                                       | 33                                                     | 1.58E-16 | 2.11E-15 |          |
|                          | GO:0022613-ribonucleoprotein complex biogenesis and assembly                                    | 23                                                     | 1.77E-15 | 3.40E-14 |          |
|                          | GO:0044237-cellular metabolic process                                                           | 146                                                    | 7.38E-15 | 1.42E-13 |          |
|                          | GO:0008152-metabolic process                                                                    | 154                                                    | 1.61E-14 | 3.08E-13 |          |
|                          | GO:0044238-primary metabolic process                                                            | 142                                                    | 1.55E-12 | 2.96E-11 |          |
|                          | GO:0042254-ribosome biogenesis and assembly                                                     | 15                                                     | 2.31E-12 | 4.43E-11 |          |
|                          | GO:0043170-macromolecule metabolic process                                                      | 129                                                    | 1.04E-11 | 2.00E-10 |          |
|                          | GO:0044249-cellular biosynthetic process                                                        | 43                                                     | 1.74E-11 | 3.33E-10 |          |
|                          | GO:0006412-translation                                                                          | 31                                                     | 3.61E-11 | 6.91E-10 |          |
|                          | GO:0010467-gene expression                                                                      | 83                                                     | 8.48E-11 | 1.62E-09 |          |
|                          | GO:0009058-biosynthetic process                                                                 | 48                                                     | 2.83E-10 | 5.42E-09 |          |
|                          | GO:0006364-rRNA processing                                                                      | 11                                                     | 2.99E-09 | 5.72E-08 |          |
|                          | GO:0009059-macromolecule biosynthetic process                                                   | 34                                                     | 4.41E-09 | 8.44E-08 |          |
|                          | GO:0016072-rRNA metabolic process                                                               | 11                                                     | 4.75E-09 | 9.09E-08 |          |
|                          | GO:0008380-RNA splicing                                                                         | 17                                                     | 8.90E-09 | 1.70E-07 |          |
|                          | GO:0006397-mRNA processing                                                                      | 18                                                     | 9.26E-09 | 1.77E-07 |          |
|                          | GO:0016071-mRNA metabolic process                                                               | 19                                                     | 2.11E-08 | 4.04E-07 |          |
|                          | GO:0006139-nucleobase, nucleoside, nucleotide and nucleic acid metabolic process                | 77                                                     | 1.56E-06 | 2.98E-05 |          |
|                          | GO:0006260-DNA replication                                                                      | 14                                                     | 7.06E-06 | 1.35E-04 |          |
|                          | GO:0009987-cellular process                                                                     | 170                                                    | 1.05E-05 | 2.01E-04 |          |
|                          | GO:0044260-cellular macromolecule metabolic process                                             | 67                                                     | 1.48E-05 | 2.83E-04 |          |
|                          | GO:0000398-nuclear mRNA splicing, via spliceosome                                               | 8                                                      | 1.78E-05 | 3.40E-04 |          |
|                          | GO:0000377-RNA splicing, via transesterification reactions with bulged adenosine as nucleophile | 8                                                      | 1.78E-05 | 3.40E-04 |          |
|                          | GO:0000375-RNA splicing, via transesterification reactions                                      | 8                                                      | 1.78E-05 | 3.40E-04 |          |
|                          | GO:0044267-cellular protein metabolic process                                                   | 66                                                     | 1.82E-05 | 3.49E-04 |          |
|                          | GO:0006259-DNA metabolic process                                                                | 26                                                     | 1.99E-05 | 3.80E-04 |          |
|                          | GO:0006268-DNA unwinding during replication                                                     | 5                                                      | 2.15E-05 | 4.12E-04 |          |
|                          | GO:0032392-DNA geometric change                                                                 | 5                                                      | 3.69E-05 | 7.05E-04 |          |
|                          | GO:0032508-DNA duplex unwinding                                                                 | 5                                                      | 3.69E-05 | 7.05E-04 |          |
|                          | GO:0006144-purine base metabolic process                                                        | 4                                                      | 5.18E-05 | 9.90E-04 |          |
|                          | GO:0019538-protein metabolic process                                                            | 67                                                     | 6.28E-05 | 0.001    |          |
|                          | GO:0006096-glycolysis                                                                           | 7                                                      | 7.99E-05 | 0.002    |          |
|                          | GO:0006996-organelle organization and biogenesis                                                | 30                                                     | 1.12E-04 | 0.002    |          |
|                          | GO:0016070-RNA metabolic process                                                                | 57                                                     | 1.15E-04 | 0.002    |          |
|                          | GO:0006007-glucose catabolic process                                                            | 7                                                      | 1.85E-04 | 0.004    |          |
|                          | GO:0016043-cellular component organization and biogenesis                                       | 52                                                     | 2.08E-04 | 0.004    |          |
|                          | GO:0006261-DNA-dependent DNA replication                                                        | 8                                                      | 2.91E-04 | 0.006    |          |
|                          | GO:0019320-hexose catabolic process                                                             | 7                                                      | 4.02E-04 | 0.008    |          |
|                          | GO:0022618-protein-RNA complex assembly                                                         | 8                                                      | 4.02E-04 | 0.008    |          |
|                          | GO:0046365-monosaccharide catabolic process                                                     | 7                                                      | 4.28E-04 | 0.008    |          |
|                          | GO:0046164-alcohol catabolic process                                                            | 7                                                      | 4.86E-04 | 0.009    |          |
|                          | GO:0022607-cellular component assembly                                                          | 18                                                     | 6.39E-04 | 0.012    |          |
|                          | GO:0009112-nucleobase metabolic process                                                         | 4                                                      | 7.67E-04 | 0.015    |          |
|                          | GO:0009113-purine base biosynthetic process                                                     | 3                                                      | 7.89E-04 | 0.015    |          |
|                          | GO:0065003-macromolecular complex assembly                                                      | 17                                                     | 8.17E-04 | 0.016    |          |
|                          | GO:0006520-amino acid metabolic process                                                         | 12                                                     | 8.95E-04 | 0.017    |          |
|                          | GO:0009161-ribonucleoside monophosphate metabolic process                                       | 4                                                      | 0.001    | 0.024    |          |
|                          | GO:0009156-ribonucleoside monophosphate biosynthetic process                                    | 4                                                      | 0.001    | 0.024    |          |
|                          | GO:0006913-nucleocytoplasmic transport                                                          | 8                                                      | 0.001    | 0.026    |          |
|                          | GO:0006457-protein folding                                                                      | 11                                                     | 0.001    | 0.027    |          |
|                          | GO:0051169-nuclear transport                                                                    | 8                                                      | 0.002    | 0.028    |          |
|                          | GO:0009124-nucleoside monophosphate biosynthetic process                                        | 4                                                      | 0.002    | 0.028    |          |
|                          | GO:0009123-nucleoside monophosphate metabolic process                                           | 4                                                      | 0.002    | 0.028    |          |
|                          | GO:0044275-cellular carbohydrate catabolic process                                              | 7                                                      | 0.002    | 0.033    |          |
|                          | GO:0009064-glutamine family amino acid metabolic process                                        | 5                                                      | 0.002    | 0.034    |          |
|                          | GO:0043283-biopolymer metabolic process                                                         | 82                                                     | 0.002    | 0.040    |          |
|                          | GO:0016052-carbohydrate catabolic process                                                       | 7                                                      | 0.002    | 0.045    |          |
|                          | GO:0006006-glucose metabolic process                                                            | 7                                                      | 0.003    | 0.047    |          |
|                          | GO:0044265-cellular macromolecule catabolic process                                             | 12                                                     | 0.003    | 0.051    |          |
|                          | GO:0006399-tRNA metabolic process                                                               | 7                                                      | 0.003    | 0.058    |          |
|                          | GO:0007049-cell cycle                                                                           | 21                                                     | 0.004    | 0.067    |          |
|                          | GO:0008652-amino acid biosynthetic process                                                      | 5                                                      | 0.004    | 0.069    |          |
|                          | GO:0006281-DNA repair                                                                           | 10                                                     | 0.004    | 0.074    |          |
|                          | GO:0006519-amino acid and derivative metabolic process                                          | 12                                                     | 0.004    | 0.082    |          |
|                          | GO:0006284-base-excision repair                                                                 | 4                                                      | 0.004    | 0.082    |          |
|                          | GO:0046112-nucleobase biosynthetic process                                                      | 3                                                      | 0.005    | 0.084    |          |
|                          | GO:0006974-response to DNA damage stimulus                                                      | 11                                                     | 0.005    | 0.084    |          |
|                          | GO:0006270-DNA replication initiation                                                           | 4                                                      | 0.005    | 0.099    |          |
|                          | Down-regulated in 4+ tumor                                                                      | GO:0048856-anatomical structure development            | 20       | 1.38E-07 | 2.64E-06 |
|                          |                                                                                                 | GO:0007275-multicellular organismal development        | 20       | 5.57E-07 | 1.07E-05 |
|                          |                                                                                                 | GO:0032502-developmental process                       | 23       | 9.05E-07 | 1.73E-05 |
|                          |                                                                                                 | GO:0048812-neurite morphogenesis                       | 7        | 1.49E-06 | 2.85E-05 |
|                          |                                                                                                 | GO:0048667-neuron morphogenesis during differentiation | 7        | 1.49E-06 | 2.85E-05 |
|                          |                                                                                                 | GO:0032990-cell part morphogenesis                     | 8        | 1.51E-06 | 2.89E-05 |
|                          |                                                                                                 | GO:0030030-cell projection organization and biogenesis | 8        | 1.51E-06 | 2.89E-05 |

**Supplemental Table 6: mRNA and protein expression data measured by Affymetrix and ICAT**

| <b>Log<sub>2</sub> ratio (4+ / 1-)</b> |               |                        |                           |
|----------------------------------------|---------------|------------------------|---------------------------|
| <b>Symbol</b>                          | <b>GeneID</b> | <b>mRNA expression</b> | <b>Protein expression</b> |
| A1BG                                   | 1             | 0.410                  | 0.149                     |
| A2M                                    | 2             | -0.884                 | -0.918                    |
| AAMP                                   | 14            | -0.244                 | 0.161                     |
| AARS                                   | 16            | -0.063                 | 0.494                     |
| ABCE1                                  | 6059          | 1.784                  | 1.760                     |
| ABHD12                                 | 26090         | -0.204                 | 1.188                     |
| ABR                                    | 29            | -0.744                 | -2.051                    |
| ACAD8                                  | 27034         | 0.058                  | -1.884                    |
| ACADVL                                 | 37            | -1.142                 | -0.475                    |
| ACAN                                   | 176           | 0.066                  | -0.660                    |
| ACAT1                                  | 38            | -0.077                 | 1.582                     |
| ACAT2                                  | 39            | 0.439                  | 0.371                     |
| ACIN1                                  | 22985         | 0.084                  | 0.213                     |
| ACLY                                   | 47            | -0.608                 | -0.664                    |
| ACO2                                   | 50            | -0.071                 | -0.151                    |
| ACOT7                                  | 11332         | -0.467                 | -0.357                    |
| ACP2                                   | 53            | -0.533                 | 0.066                     |
| ACSL1                                  | 2180          | 1.342                  | 1.601                     |
| ACSL4                                  | 2182          | -0.133                 | 0.644                     |
| ACTB                                   | 60            | -0.071                 | 0.087                     |
| ACTL6A                                 | 86            | 2.070                  | 1.590                     |
| ACTL6B                                 | 51412         | -0.863                 | 0.103                     |
| ACTN1                                  | 87            | 0.363                  | 1.118                     |
| ACTN4                                  | 81            | 0.034                  | 0.874                     |
| ACTR1B                                 | 10120         | -0.589                 | -0.079                    |
| ACTR2                                  | 10097         | -0.493                 | 0.164                     |
| ACTR3                                  | 10096         | 0.196                  | 0.217                     |
| ADAR                                   | 103           | -0.187                 | 0.842                     |
| ADD1                                   | 118           | -0.428                 | -0.652                    |
| ADD2                                   | 119           | 0.221                  | -0.264                    |
| ADFP                                   | 123           | 0.612                  | 0.023                     |
| ADH5                                   | 128           | 0.818                  | 0.601                     |
| ADK                                    | 132           | 0.437                  | 0.354                     |
| ADNP                                   | 23394         | 0.224                  | 0.184                     |
| ADO                                    | 84890         | 0.534                  | 1.034                     |
| ADRM1                                  | 11047         | -0.132                 | 0.283                     |
| ADSS                                   | 159           | 0.511                  | -0.420                    |
| AFG3L2                                 | 10939         | 0.349                  | 1.458                     |
| AFM                                    | 173           | 0.150                  | -1.670                    |
| AGRN                                   | 375790        | -2.562                 | 0.760                     |
| AGTPBP1                                | 23287         | -0.030                 | -1.143                    |
| AHCY                                   | 191           | 2.158                  | 1.001                     |
| AHCYL1                                 | 10768         | 0.345                  | -0.091                    |
| AIP                                    | 9049          | 0.650                  | 0.724                     |
| AKAP1                                  | 8165          | 0.873                  | 1.871                     |
| AKAP12                                 | 9590          | -0.053                 | 1.459                     |
| AKAP9                                  | 10142         | 0.471                  | 0.034                     |
| AKR1A1                                 | 10327         | 0.306                  | -0.502                    |
| AKR1B1                                 | 231           | 0.366                  | 0.438                     |
| AKR7A2                                 | 8574          | -0.296                 | -0.321                    |
| AKT2                                   | 208           | 0.045                  | -0.933                    |
| ALAD                                   | 210           | -0.640                 | -0.201                    |
| ALB                                    | 213           | -0.701                 | -0.699                    |
| ALCAM                                  | 214           | -2.008                 | -2.047                    |
| ALDH1L2                                | 160428        | 1.058                  | 0.207                     |
| ALDH2                                  | 217           | -0.044                 | -0.027                    |
| ALDH4A1                                | 8659          | -0.337                 | -0.855                    |
| ALDH5A1                                | 7915          | 0.461                  | 0.208                     |
| ALDH9A1                                | 223           | 0.242                  | -0.126                    |
| ALDOA                                  | 226           | 0.974                  | 1.283                     |
| ALK                                    | 238           | 1.950                  | 1.462                     |
| AMBP                                   | 259           | -0.056                 | -1.151                    |
| AMPD2                                  | 271           | 0.059                  | 0.727                     |
| ANK1                                   | 286           | -1.028                 | -0.842                    |
| ANK2                                   | 287           | 0.247                  | -0.214                    |
| ANKFY1                                 | 51479         | -0.816                 | -0.634                    |

|          |        |        |        |
|----------|--------|--------|--------|
| ANKHD1   | 54882  | 0.325  | 1.023  |
| ANKRD17  | 26057  | 0.386  | 0.665  |
| ANKRD28  | 23243  | 0.599  | -0.406 |
| ANP32A   | 8125   | 1.169  | 1.183  |
| ANP32E   | 81611  | 1.401  | 1.212  |
| ANXA2    | 302    | -1.480 | -2.816 |
| ANXA4    | 307    | -0.152 | 3.271  |
| ANXA7    | 310    | -0.173 | -0.698 |
| AOF2     | 23028  | -0.126 | 1.231  |
| AP1B1    | 162    | -0.154 | 0.128  |
| AP1G1    | 164    | -0.002 | 1.001  |
| AP2A1    | 160    | -0.358 | -0.434 |
| AP2A2    | 161    | -0.293 | -0.151 |
| AP2B1    | 163    | 0.213  | -0.863 |
| AP2M1    | 1173   | -0.194 | -0.176 |
| AP3D1    | 8943   | -0.143 | 0.463  |
| AP3M1    | 26985  | -0.020 | 0.370  |
| AP3M2    | 10947  | 0.066  | -0.163 |
| APEH     | 327    | 0.109  | -0.448 |
| APEX1    | 328    | 1.447  | 2.012  |
| APLP1    | 333    | -0.749 | 1.123  |
| APOA1BP  | 128240 | 0.431  | 0.593  |
| APOB     | 338    | -0.165 | 0.077  |
| APOE     | 348    | -0.997 | -1.502 |
| APOM     | 55937  | 0.280  | -0.699 |
| APP      | 351    | 0.056  | 2.283  |
| AQR      | 9716   | 0.407  | 1.428  |
| ARCN1    | 372    | 0.372  | 0.422  |
| ARFGEF1  | 10565  | -0.071 | -0.534 |
| ARFRP1   | 10139  | -0.572 | 3.653  |
| ARHGAP29 | 9411   | 2.045  | -0.361 |
| ARHGEF2  | 9181   | 0.112  | -0.502 |
| ARHGEF7  | 8874   | -0.043 | 0.009  |
| ARIH1    | 25820  | 0.491  | 0.108  |
| ARIH2    | 10425  | 0.189  | 0.930  |
| ARL3     | 403    | -0.221 | -0.176 |
| ARMET    | 7873   | 0.805  | 1.683  |
| ARPC1A   | 10552  | 0.744  | 0.283  |
| ARPC1B   | 10095  | 0.127  | 0.332  |
| ARPC2    | 10109  | -0.319 | 0.178  |
| ARPC5    | 10092  | -0.217 | -0.851 |
| ARRB1    | 408    | -0.354 | -0.151 |
| ARRB2    | 409    | -0.314 | -0.273 |
| ARS2     | 51593  | -0.079 | 0.296  |
| ASCC3L1  | 23020  | -0.236 | 1.760  |
| ASL      | 435    | -0.583 | -0.438 |
| ASMTL    | 8623   | 0.210  | 0.933  |
| ASNA1    | 439    | 0.202  | 0.118  |
| ASNS     | 440    | 0.888  | 1.533  |
| ASRGL1   | 80150  | 0.505  | 0.679  |
| ASS1     | 445    | 0.718  | 2.581  |
| ATF7IP   | 55729  | -0.044 | 1.567  |
| ATG7     | 10533  | 0.154  | 0.169  |
| ATIC     | 471    | 1.550  | 1.282  |
| ATP1A1   | 476    | -0.218 | -0.188 |
| ATP1A3   | 478    | -1.537 | -0.528 |
| ATP1B1   | 481    | 0.062  | -0.377 |
| ATP2A2   | 488    | -0.538 | 1.071  |
| ATP2B4   | 493    | -1.038 | -2.829 |
| ATP2C1   | 27032  | 0.318  | -1.303 |
| ATP5C1   | 509    | 0.646  | 0.273  |
| ATP5O    | 539    | 0.995  | 0.115  |
| ATP6V1C1 | 528    | -0.578 | -1.209 |
| ATP8A1   | 10396  | -0.449 | -1.582 |
| ATP9A    | 10079  | -0.220 | -0.475 |
| ATPAF2   | 91647  | -0.182 | 1.077  |
| ATRN     | 8455   | -0.057 | -0.756 |
| ATXN10   | 25814  | 0.067  | 0.077  |
| AZGP1    | 563    | -0.018 | -0.151 |
| BAG1     | 573    | 0.201  | 1.190  |
| BAG2     | 9532   | 0.150  | 1.310  |

|           |        |        |        |
|-----------|--------|--------|--------|
| BAG5      | 9529   | 0.725  | 0.453  |
| BAT1      | 7919   | 0.174  | 0.665  |
| BAZ1B     | 9031   | 0.133  | 3.766  |
| BCKDHB    | 594    | -0.103 | 0.283  |
| BGN       | 633    | -1.589 | -1.319 |
| BIRC6     | 57448  | 0.289  | 0.045  |
| BLMH      | 642    | -0.465 | 0.208  |
| BOLA2     | 552900 | 0.716  | 0.927  |
| BOP1      | 23246  | 0.701  | 2.298  |
| BPGM      | 669    | 0.187  | -1.455 |
| BPNT1     | 10380  | 0.027  | 0.623  |
| BRUNOL4   | 56853  | -1.613 | -1.046 |
| BRWD1     | 54014  | 0.308  | 0.502  |
| BRWD2     | 55717  | -0.346 | -1.769 |
| BTAF1     | 9044   | 0.294  | 1.070  |
| BTB       | 686    | -0.018 | 0.183  |
| BUB3      | 9184   | 0.795  | 0.426  |
| BUD31     | 8896   | 0.807  | 0.095  |
| C11orf68  | 83638  | 0.210  | 0.892  |
| C14orf166 | 51637  | 1.212  | 0.663  |
| C14orf4   | 64207  | -0.794 | 0.301  |
| C17orf49  | 124944 | -0.028 | 0.236  |
| C1orf128  | 57095  | -0.657 | -1.516 |
| C1orf163  | 65260  | 0.088  | 2.860  |
| C1orf27   | 54953  | 0.306  | 0.886  |
| C1R       | 715    | -0.288 | -0.711 |
| C1S       | 716    | -0.146 | -0.759 |
| C2        | 717    | -0.477 | -0.448 |
| C20orf27  | 54976  | 0.535  | 0.874  |
| C20orf3   | 57136  | 0.085  | 0.169  |
| C21orf33  | 8209   | 0.128  | 0.413  |
| C2orf3    | 6936   | 0.611  | 2.188  |
| C3orf10   | 55845  | 0.702  | 0.541  |
| C4orf27   | 54969  | 1.439  | 1.510  |
| C5        | 727    | 0.219  | -0.293 |
| C6orf115  | 58527  | 0.830  | 0.034  |
| C7orf50   | 84310  | 0.102  | 2.141  |
| C8B       | 732    | 0.385  | 0.789  |
| C8orf55   | 51337  | 0.107  | 0.586  |
| C8orf82   | 414919 | 0.524  | -1.461 |
| C9orf125  | 84302  | 0.163  | 0.971  |
| C9orf142  | 286257 | 0.135  | 1.087  |
| CA3       | 761    | -1.130 | 2.510  |
| CACNA2D1  | 781    | -0.060 | 0.189  |
| CACYBP    | 27101  | 0.878  | 1.724  |
| CAD       | 790    | -0.227 | 0.984  |
| CADM1     | 23705  | -0.818 | -2.767 |
| CADM2     | 253559 | -0.148 | -0.521 |
| CADM4     | 199731 | -0.466 | 0.231  |
| CADPS     | 8618   | -1.203 | -1.201 |
| CALR      | 811    | 0.135  | 1.050  |
| CAND1     | 55832  | 0.315  | 0.571  |
| CAND2     | 23066  | -0.120 | -1.442 |
| CANX      | 821    | 0.335  | 1.012  |
| CAP1      | 10487  | -0.997 | -0.981 |
| CAPN1     | 823    | -0.181 | -0.370 |
| CAPN2     | 824    | 0.198  | -0.151 |
| CAPNS1    | 826    | -0.396 | -0.079 |
| CAPZA2    | 830    | 0.074  | 0.135  |
| CAPZB     | 832    | -0.660 | -0.227 |
| CAST      | 831    | -0.001 | -0.852 |
| CAT       | 847    | 0.787  | -0.502 |
| CBR3      | 874    | 0.386  | -0.079 |
| CBS       | 875    | 0.503  | 2.336  |
| CBX5      | 23468  | 0.377  | 2.037  |
| CCT2      | 10576  | 0.749  | 0.808  |
| CCT3      | 7203   | 0.745  | 0.502  |
| CCT4      | 10575  | 0.698  | 0.462  |
| CCT5      | 22948  | 0.739  | 0.889  |
| CCT7      | 10574  | 0.910  | 0.533  |
| CCT8      | 10694  | -0.069 | 0.799  |

|          |        |        |        |
|----------|--------|--------|--------|
| CD14     | 929    | -0.114 | 0.611  |
| CD36     | 948    | -0.546 | 0.488  |
| CD44     | 960    | -1.774 | -1.705 |
| CD55     | 1604   | 0.297  | 0.217  |
| CD59     | 966    | -0.323 | -0.163 |
| CD93     | 22918  | -1.361 | -0.933 |
| CDC37    | 11140  | -0.048 | -0.420 |
| CDC42    | 998    | -0.036 | 0.283  |
| CDC42EP4 | 23580  | -1.201 | -1.042 |
| CDH2     | 1000   | 0.111  | 0.463  |
| CENPB    | 1059   | 0.051  | 0.310  |
| CEP170   | 9859   | 0.196  | 1.063  |
| CFH      | 3075   | -0.295 | -0.079 |
| CFHR2    | 3080   | -0.475 | 0.066  |
| CFI      | 3426   | -0.314 | 0.371  |
| CFL1     | 1072   | 0.207  | 0.506  |
| CHCHD6   | 84303  | 0.807  | 1.073  |
| CHD4     | 1108   | 0.169  | 1.611  |
| CHGA     | 1113   | 0.161  | 1.128  |
| CHGB     | 1114   | -0.912 | -2.209 |
| CHN1     | 1123   | 0.397  | 0.291  |
| CHORDC1  | 26973  | 0.280  | 0.956  |
| CISD1    | 55847  | 0.279  | 1.720  |
| CISD2    | 493856 | 1.025  | 1.867  |
| CKAP5    | 9793   | 0.832  | 2.034  |
| CKB      | 1152   | 0.660  | 1.807  |
| CKMT2    | 1160   | -0.347 | 2.001  |
| CLASP2   | 23122  | -0.126 | -0.201 |
| CLEC3B   | 7123   | -0.231 | -0.005 |
| CLIC1    | 1192   | -0.205 | -0.266 |
| CLIC2    | 1193   | 0.500  | 4.435  |
| CLIC4    | 25932  | 0.081  | 0.023  |
| CLSTN1   | 22883  | -1.509 | 0.327  |
| CLTB     | 1212   | -0.298 | -0.091 |
| CLTC     | 1213   | -0.183 | 0.502  |
| CLU      | 1191   | -1.436 | -1.073 |
| CNBP     | 7555   | 1.732  | 1.855  |
| CNN2     | 1265   | -0.159 | -0.249 |
| CNN3     | 1266   | 1.668  | 1.970  |
| CNNM2    | 54805  | -0.279 | -0.253 |
| CNOT1    | 23019  | 0.258  | 1.061  |
| CNP      | 1267   | -0.111 | -0.280 |
| CNPY3    | 10695  | 0.179  | 1.217  |
| CNTN1    | 1272   | -1.662 | -1.877 |
| COIL     | 8161   | 1.216  | 0.611  |
| COL1A1   | 1277   | -4.024 | -0.842 |
| COL3A1   | 1281   | -3.578 | -0.067 |
| COL4A1   | 1282   | -1.937 | -0.810 |
| COL4A2   | 1284   | -1.619 | -1.561 |
| COL6A1   | 1291   | -0.831 | -0.279 |
| COMMD5   | 28991  | 0.302  | 0.098  |
| COMP     | 1311   | -0.941 | 0.814  |
| COPA     | 1314   | -0.260 | 0.425  |
| COPB1    | 1315   | 0.812  | -0.109 |
| COPB2    | 9276   | 0.543  | 0.892  |
| COPG     | 22820  | 0.146  | 0.498  |
| COPG2    | 26958  | 1.241  | -0.116 |
| COPS4    | 51138  | -0.148 | 0.295  |
| COPS6    | 10980  | 0.063  | 0.487  |
| CORO1A   | 11151  | -0.286 | 0.012  |
| CORO1C   | 23603  | 0.351  | 0.747  |
| COX17    | 10063  | 0.705  | 1.861  |
| COX6B1   | 1340   | 0.984  | 0.405  |
| CP       | 1356   | 0.368  | 0.510  |
| CPNE3    | 8895   | 0.098  | 0.236  |
| CPSF2    | 53981  | 0.173  | 1.029  |
| CPSF3    | 51692  | 1.234  | 1.608  |
| CRABP2   | 1382   | 0.358  | 2.409  |
| CRBN     | 51185  | 0.623  | 0.034  |
| CRELD1   | 78987  | 0.057  | 0.291  |
| CRIP2    | 1397   | -2.402 | -2.233 |

|        |        |        |        |
|--------|--------|--------|--------|
| CRKL   | 1399   | 0.368  | 0.904  |
| CRMP1  | 1400   | -0.296 | -0.363 |
| CRYZ   | 1429   | 1.285  | 1.112  |
| CSDE1  | 7812   | 0.264  | 0.128  |
| CSE1L  | 1434   | 1.048  | 0.610  |
| CSNK2B | 1460   | 0.677  | 0.839  |
| CSRP1  | 1465   | 0.631  | -2.292 |
| CSTF2  | 1478   | 0.407  | 0.536  |
| CSTF3  | 1479   | 0.573  | 0.892  |
| CTBP1  | 1487   | 0.129  | 0.479  |
| CTCF   | 10664  | 0.678  | -0.228 |
| CTNNA2 | 1496   | -0.895 | -0.502 |
| CTNNB1 | 1499   | 0.746  | 0.264  |
| CTNND1 | 1500   | -0.095 | 0.517  |
| CTPS   | 1503   | 0.117  | 0.740  |
| CTSC   | 1075   | -0.699 | -0.290 |
| CTSD   | 1509   | -0.433 | 0.061  |
| CTTN   | 2017   | 0.439  | -0.580 |
| CUL2   | 8453   | 0.447  | -0.079 |
| CUL4A  | 8451   | 0.401  | 0.867  |
| CUL5   | 8065   | 0.779  | 0.542  |
| CXADR  | 1525   | 0.063  | 0.077  |
| CXXC1  | 30827  | -0.082 | 0.609  |
| CYB5R1 | 51706  | -0.245 | -0.628 |
| CYC1   | 1537   | 0.678  | 0.950  |
| CYTH1  | 9267   | -0.387 | -0.201 |
| DARS   | 1615   | 1.008  | 0.087  |
| DAZAP1 | 26528  | 1.029  | 0.630  |
| DBH    | 1621   | -0.380 | 0.686  |
| DBN1   | 1627   | -0.276 | -0.253 |
| DBNL   | 28988  | -0.449 | -0.280 |
| DC2    | 58505  | 1.581  | 1.178  |
| DCLK1  | 9201   | -0.277 | 1.872  |
| DCTN1  | 1639   | -0.725 | -0.351 |
| DCX    | 1641   | 0.920  | 1.413  |
| DCXR   | 51181  | 0.961  | 0.950  |
| DDA1   | 79016  | 0.246  | 0.818  |
| DDAH1  | 23576  | -0.364 | -0.810 |
| DDAH2  | 23564  | -0.646 | -0.114 |
| DDB1   | 1642   | 0.272  | 0.909  |
| DDI2   | 84301  | -0.069 | -0.727 |
| DDOST  | 1650   | -0.237 | 0.849  |
| DDT    | 1652   | 0.409  | -0.114 |
| DDX1   | 1653   | 0.472  | 0.454  |
| DDX17  | 10521  | -0.021 | 1.183  |
| DDX18  | 8886   | 0.871  | 2.431  |
| DDX19B | 11269  | 0.438  | 0.700  |
| DDX21  | 9188   | 1.271  | 2.752  |
| DDX23  | 9416   | 0.446  | 2.193  |
| DDX27  | 55661  | 0.143  | 2.215  |
| DDX39  | 10212  | 1.413  | 1.829  |
| DDX3X  | 1654   | 0.364  | 1.537  |
| DDX41  | 51428  | 0.097  | 0.713  |
| DDX5   | 1655   | 0.229  | 1.446  |
| DDX6   | 1656   | 0.631  | 1.154  |
| DECR1  | 1666   | 0.824  | 1.655  |
| DEFA1  | 1667   | -1.644 | 0.296  |
| DEK    | 7913   | 1.013  | 1.781  |
| DEPDC5 | 9681   | -0.206 | -0.767 |
| DERA   | 51071  | -1.107 | 0.192  |
| DFFA   | 1676   | -0.339 | -0.733 |
| DHX15  | 1665   | 1.062  | 0.852  |
| DHX9   | 1660   | 0.509  | 1.283  |
| DIAPH1 | 1729   | -0.236 | 0.354  |
| DIS3   | 22894  | 1.135  | 1.273  |
| DIS3L2 | 129563 | 0.459  | -0.055 |
| DKC1   | 1736   | 1.696  | 1.586  |
| DLAT   | 1737   | 0.758  | 0.921  |
| DLD    | 1738   | 0.101  | 0.945  |
| DLK1   | 8788   | 4.520  | -0.794 |
| DMXL2  | 23312  | 0.199  | -0.377 |

|          |       |        |        |
|----------|-------|--------|--------|
| DNAJA2   | 10294 | 0.690  | 0.319  |
| DNAJA3   | 9093  | 0.578  | 0.479  |
| DNAJB1   | 3337  | 2.311  | -0.240 |
| DNAJC12  | 56521 | 0.529  | -0.568 |
| DNAJC6   | 9829  | -0.578 | -0.693 |
| DNPEP    | 23549 | 0.111  | 0.108  |
| DOCK7    | 85440 | 0.364  | 1.544  |
| DPYSL2   | 1808  | -0.450 | -0.266 |
| DPYSL3   | 1809  | -1.095 | -1.821 |
| DPYSL4   | 10570 | -0.315 | -0.688 |
| DPYSL5   | 56896 | -0.617 | -0.488 |
| DRAP1    | 10589 | 0.631  | 0.555  |
| DST      | 667   | -0.432 | 0.405  |
| DSTN     | 11034 | 0.253  | -0.530 |
| DTYMK    | 1841  | 1.132  | 2.859  |
| DUS3L    | 56931 | 0.149  | 1.354  |
| DUT      | 1854  | 1.230  | 3.306  |
| DYNC1H1  | 1778  | -0.359 | 0.630  |
| DYNC1LI2 | 1783  | -0.111 | 0.431  |
| DYNLL1   | 8655  | -0.189 | -0.033 |
| ECH1     | 1891  | -0.026 | 0.864  |
| ECM1     | 1893  | -0.439 | -0.096 |
| EDC4     | 23644 | 0.077  | 0.217  |
| EEF1A1   | 1915  | 0.253  | 1.388  |
| EEF1A2   | 1917  | -0.229 | 0.737  |
| EEF1B2   | 1933  | 1.552  | 1.203  |
| EEF1D    | 1936  | 1.132  | 0.786  |
| EEF1G    | 1937  | -0.352 | 1.354  |
| EEF2     | 1938  | 0.427  | 1.246  |
| EFEMP1   | 2202  | -0.036 | -0.745 |
| EFEMP2   | 30008 | -0.367 | -1.488 |
| EFTUD1   | 79631 | 1.040  | 1.422  |
| EFTUD2   | 9343  | 0.064  | 1.423  |
| EGF      | 1950  | -0.513 | 0.258  |
| EHMT2    | 10919 | 0.101  | 1.405  |
| EIF2B3   | 8891  | -0.068 | 0.422  |
| EIF2B5   | 8893  | 0.310  | 0.397  |
| EIF2C1   | 26523 | -0.386 | 0.035  |
| EIF2S1   | 1965  | 0.951  | 1.154  |
| EIF2S3   | 1968  | 0.830  | 1.087  |
| EIF3A    | 8661  | 0.411  | 0.653  |
| EIF3B    | 8662  | 0.755  | 1.113  |
| EIF3C    | 8663  | 1.426  | 0.855  |
| EIF3EIP  | 51386 | 0.376  | 0.786  |
| EIF3G    | 8666  | 0.962  | 0.601  |
| EIF3I    | 8668  | 0.125  | 0.915  |
| EIF3K    | 27335 | 0.605  | 0.799  |
| EIF4A1   | 1973  | 0.643  | 0.103  |
| EIF4G1   | 1981  | -0.112 | 0.641  |
| EIF4H    | 7458  | 0.602  | 1.221  |
| EIF5A    | 1984  | 0.436  | 0.518  |
| EIF5B    | 9669  | 0.583  | 0.686  |
| EIF6     | 3692  | -0.418 | 0.556  |
| ELAC2    | 60528 | 0.083  | 0.740  |
| ELAVL2   | 1993  | 0.122  | -0.139 |
| ELAVL3   | 1995  | 0.004  | 1.840  |
| EML2     | 24139 | -0.449 | 1.217  |
| EML4     | 27436 | 0.009  | 0.541  |
| ENAH     | 55740 | 0.305  | 1.128  |
| ENO2     | 2026  | -0.686 | 0.397  |
| ENPP2    | 5168  | -0.310 | 0.727  |
| EPB41    | 2035  | -0.029 | -0.664 |
| EPB41L1  | 2036  | -1.975 | 0.430  |
| EPB41L3  | 23136 | -2.893 | -2.797 |
| EPB42    | 2038  | -0.189 | -1.000 |
| EPHA5    | 2044  | -0.457 | -2.664 |
| EPHB3    | 2049  | -0.836 | -1.233 |
| EPHX2    | 2053  | -0.377 | -0.159 |
| EPM2AIP1 | 9852  | 0.567  | 0.526  |
| EPRS     | 2058  | 0.657  | 0.413  |
| ERAP1    | 51752 | -0.429 | -0.873 |

|         |        |        |        |
|---------|--------|--------|--------|
| ERH     | 2079   | 0.545  | 0.867  |
| ERO1L   | 30001  | 0.169  | 0.198  |
| ESD     | 2098   | 0.818  | 0.485  |
| ETFA    | 2108   | 1.690  | 1.077  |
| ETFB    | 2109   | -0.263 | 1.296  |
| EXDL2   | 55218  | 0.122  | 0.754  |
| EXOC1   | 55763  | 0.518  | 1.082  |
| EXOC8   | 149371 | 0.686  | 1.717  |
| EXOSC2  | 23404  | 0.870  | 1.560  |
| EXOSC7  | 23016  | 0.812  | 1.255  |
| EXOSC8  | 11340  | 0.756  | 1.341  |
| EXOSC9  | 5393   | 1.133  | 1.707  |
| F11     | 2160   | -0.668 | 0.874  |
| F12     | 2161   | 1.185  | -0.214 |
| F13B    | 2165   | 0.104  | -1.406 |
| F9      | 2158   | -0.669 | 0.178  |
| FABP5   | 2171   | 0.179  | 0.283  |
| FAM164A | 51101  | -0.315 | 0.012  |
| FAM44A  | 259282 | 0.495  | 0.734  |
| FAM62A  | 23344  | -0.766 | -0.801 |
| FAM91A1 | 157769 | -0.068 | 1.830  |
| FARP1   | 10160  | 0.082  | -0.201 |
| FARSA   | 2193   | 0.710  | 1.341  |
| FARSB   | 10056  | 0.711  | 1.962  |
| FASN    | 2194   | -0.027 | 1.498  |
| FBL     | 2091   | 2.246  | 3.086  |
| FBLN1   | 2192   | 1.203  | 1.367  |
| FBN1    | 2200   | -0.002 | -0.767 |
| FBXO30  | 84085  | -0.329 | -1.217 |
| FBXO7   | 25793  | 0.132  | -0.699 |
| FDPS    | 2224   | 0.108  | 0.035  |
| FECH    | 2235   | 0.070  | -0.293 |
| FERMT2  | 10979  | 0.540  | -3.510 |
| FETUB   | 26998  | -0.296 | -0.502 |
| FGA     | 2243   | -0.009 | -2.244 |
| FGB     | 2244   | 0.080  | -2.189 |
| FGFBP2  | 83888  | 0.697  | -0.214 |
| FGG     | 2266   | 0.071  | -2.225 |
| FHL1    | 2273   | -0.073 | 1.590  |
| FHOD1   | 29109  | -0.188 | -0.314 |
| FKBP1A  | 2280   | 0.095  | 0.319  |
| FKBP4   | 2288   | 0.799  | 2.014  |
| FKBP5   | 2289   | 0.282  | 0.699  |
| FKBP8   | 23770  | -0.147 | -0.121 |
| FLAD1   | 80308  | 0.051  | -0.715 |
| FLII    | 2314   | -1.055 | -0.472 |
| FLNA    | 2316   | 0.159  | 0.713  |
| FLNB    | 2317   | -0.099 | 2.564  |
| FLNC    | 2318   | 0.820  | 3.240  |
| FLOT1   | 10211  | -0.350 | -0.652 |
| FN1     | 2335   | -2.900 | 1.686  |
| FN3KRP  | 79672  | 0.544  | 0.615  |
| FNTA    | 2339   | 0.888  | 0.962  |
| FREQ    | 23413  | 0.102  | 0.740  |
| FSCN1   | 6624   | -0.011 | 0.077  |
| FTH1    | 2495   | 0.003  | -2.354 |
| FTO     | 79068  | -0.092 | 1.035  |
| FUBP1   | 8880   | 0.297  | 1.278  |
| FXVD6   | 53826  | -0.070 | 0.336  |
| G6PD    | 2539   | 0.277  | -0.474 |
| GAA     | 2548   | -0.868 | -0.151 |
| GABPA   | 2551   | 0.364  | 1.061  |
| GALK1   | 2584   | 0.005  | -1.185 |
| GAPDH   | 2597   | 0.789  | 1.169  |
| GARNL4  | 23108  | -0.561 | 0.178  |
| GART    | 2618   | 0.511  | 1.219  |
| GATM    | 2628   | -0.017 | -0.432 |
| GCLC    | 2729   | 0.262  | -0.406 |
| GCLM    | 2730   | 0.460  | -0.652 |
| GCN1L1  | 10985  | -0.157 | 0.945  |
| GDI1    | 2664   | -0.074 | 0.479  |



|         |        |        |        |
|---------|--------|--------|--------|
| GDI2    | 2665   | 0.897  | -0.010 |
| GEMIN5  | 25929  | 0.789  | 1.662  |
| GFPT1   | 2673   | -0.212 | -0.780 |
| GFRA2   | 2675   | 0.627  | 3.777  |
| GFRA3   | 2676   | -2.280 | -2.212 |
| GGCT    | 79017  | 0.977  | 0.630  |
| GIT1    | 28964  | -0.533 | 0.077  |
| GLA     | 2717   | 0.150  | -0.528 |
| GLCC1   | 113263 | 0.770  | 1.164  |
| GLG1    | 2734   | -0.731 | 0.354  |
| GLIPR2  | 152007 | 0.700  | 0.752  |
| GLO1    | 2739   | 0.784  | 0.001  |
| GLUD1   | 2746   | 0.345  | 1.730  |
| GLUL    | 2752   | 0.079  | 0.593  |
| GMPPB   | 29925  | 0.476  | -0.409 |
| GMPR    | 2766   | 0.313  | -0.756 |
| GMPS    | 8833   | 2.720  | 1.418  |
| GNA11   | 2767   | -0.226 | -0.553 |
| GNAI1   | 2770   | -0.530 | -1.887 |
| GNAI3   | 2773   | 0.768  | -0.604 |
| GNAO1   | 2775   | -1.203 | -0.640 |
| GNAQ    | 2776   | -0.125 | -0.076 |
| GNAS    | 2778   | -0.079 | -0.377 |
| GNAZ    | 2781   | -0.796 | -0.737 |
| GNB1    | 2782   | -0.937 | -1.185 |
| GNB2    | 2783   | -0.104 | -0.652 |
| GNB2L1  | 10399  | 0.581  | 0.953  |
| GNE     | 10020  | 0.847  | 0.169  |
| GNG2    | 54331  | -0.422 | -1.933 |
| GNG4    | 2786   | 0.920  | 0.190  |
| GNL1    | 2794   | -0.258 | 0.319  |
| GNPDA1  | 10007  | 0.456  | 1.354  |
| GNPNAT1 | 64841  | 1.847  | 2.177  |
| GORASP2 | 26003  | 0.611  | -0.222 |
| GOT2    | 2806   | 0.772  | 2.280  |
| GPD2    | 2820   | 0.157  | -0.188 |
| GPHN    | 10243  | 0.946  | 0.376  |
| GPI     | 2821   | 0.067  | 0.861  |
| GPKOW   | 27238  | 0.296  | -2.049 |
| GPS1    | 2873   | 0.016  | 0.203  |
| GRB2    | 2885   | -0.012 | 0.990  |
| GRHPR   | 9380   | 0.747  | 0.149  |
| GRN     | 2896   | -0.882 | -0.984 |
| GRWD1   | 83743  | 0.595  | 1.796  |
| GSN     | 2934   | -0.404 | -0.293 |
| GSR     | 2936   | 0.264  | 0.483  |
| GSS     | 2937   | 0.223  | 0.045  |
| GSTM1   | 2944   | -0.022 | -0.033 |
| GSTM2   | 2946   | 0.129  | -0.377 |
| GSTM3   | 2947   | 0.162  | 0.304  |
| GSTO1   | 9446   | 1.429  | -0.616 |
| GSTP1   | 2950   | 0.496  | 0.454  |
| GTF2I   | 2969   | -0.249 | 1.118  |
| GTF3C1  | 2975   | 0.042  | -0.800 |
| GTF3C3  | 9330   | 1.179  | -2.410 |
| GTPBP4  | 23560  | 0.970  | 1.347  |
| H2AFY   | 9555   | 0.236  | 1.500  |
| H2AFY2  | 55506  | 0.498  | 0.644  |
| HABP2   | 3026   | -0.241 | 0.045  |
| HADHA   | 3030   | 0.292  | 0.322  |
| HAGH    | 3029   | -0.014 | -0.293 |
| HARS2   | 23438  | -0.177 | -0.434 |
| HAT1    | 8520   | 1.014  | 0.615  |
| HBB     | 3043   | 0.042  | 0.962  |
| HBE1    | 3046   | -0.272 | -2.028 |
| HBG1    | 3047   | -2.348 | -3.303 |
| HBS1L   | 10767  | 0.273  | 0.273  |
| HBZ     | 3050   | 0.139  | -2.996 |
| HCFC1   | 3054   | 0.231  | 0.968  |
| HDGF    | 3068   | 0.584  | 0.665  |
| HDHD1A  | 8226   | -0.230 | -1.241 |

|           |        |        |        |
|-----------|--------|--------|--------|
| HEATR2    | 54919  | 0.804  | 2.504  |
| HECA      | 51696  | -0.228 | -0.688 |
| HGF       | 3082   | 1.891  | 1.301  |
| HIBCH     | 26275  | 0.120  | -0.434 |
| HINT1     | 3094   | 1.027  | 1.020  |
| HINT3     | 135114 | -0.975 | -0.306 |
| HK1       | 3098   | -0.591 | -0.176 |
| HK2       | 3099   | 2.271  | 2.616  |
| HLA-A     | 3105   | -1.248 | -2.389 |
| HLA-DRB1  | 3123   | -1.548 | -2.140 |
| HLTF      | 6596   | 1.040  | 1.754  |
| HMGB1     | 3146   | 0.701  | 2.296  |
| HMGB2     | 3148   | 1.577  | 2.990  |
| HMGL      | 3155   | 0.058  | -1.233 |
| HNRNPA1   | 3178   | 0.385  | 0.683  |
| HNRNPA2B1 | 3181   | 0.384  | 1.116  |
| HNRNPA3   | 220988 | 0.417  | 0.430  |
| HNRNPC    | 3183   | 0.870  | 1.341  |
| HNRNPD    | 3184   | 0.934  | 0.644  |
| HNRNPF    | 3185   | 0.347  | 3.503  |
| HNRNPH1   | 3187   | 0.110  | 0.962  |
| HNRNPK    | 3190   | 0.474  | 0.849  |
| HNRNPL    | 3191   | 0.743  | 1.541  |
| HNRNPM    | 4670   | 0.216  | 1.034  |
| HNRNPR    | 10236  | -0.488 | 0.556  |
| HNRNPU    | 3192   | 0.399  | 1.198  |
| HNRPDL    | 9987   | 0.375  | 0.623  |
| HP        | 3240   | 0.043  | 1.123  |
| HPRT1     | 3251   | 0.832  | 0.861  |
| HRG       | 3273   | -0.405 | 1.301  |
| HSD17B10  | 3028   | 0.421  | 1.123  |
| HSP90AA1  | 3320   | 0.461  | 1.203  |
| HSP90AB1  | 3326   | 0.418  | 1.092  |
| HSP90B1   | 7184   | 0.700  | -2.116 |
| HSPA14    | 51182  | 0.432  | 2.203  |
| HSPA1B    | 3304   | 1.298  | 0.108  |
| HSPA4     | 3308   | 1.062  | 0.776  |
| HSPA4L    | 22824  | 0.446  | 0.669  |
| HSPA8     | 3312   | 0.574  | 0.696  |
| HSPA9     | 3313   | 0.671  | 1.669  |
| HSPC152   | 51504  | 1.424  | 1.626  |
| HSPD1     | 3329   | 1.176  | 3.045  |
| HSPH1     | 10808  | 1.018  | 1.526  |
| HTATSF1   | 27336  | 0.484  | 0.998  |
| HUWE1     | 10075  | -0.049 | 0.974  |
| HYOU1     | 10525  | -0.146 | 1.341  |
| IAH1      | 285148 | 0.712  | 0.571  |
| IARS      | 3376   | 1.183  | 0.830  |
| ICA1      | 3382   | 0.735  | -0.033 |
| ICAM1     | 3383   | -0.092 | 0.637  |
| IDE       | 3416   | 0.124  | 0.118  |
| IDH1      | 3417   | -0.258 | -0.201 |
| IDH2      | 3418   | 0.498  | 1.113  |
| IDH3A     | 3419   | 0.568  | 0.880  |
| IFI30     | 10437  | -0.137 | 0.812  |
| IFIT5     | 24138  | 0.049  | 2.496  |
| IGF2      | 3481   | 1.166  | 0.568  |
| IGF2BP3   | 10643  | 0.352  | 0.149  |
| IGF2R     | 3482   | 0.004  | 0.319  |
| IGFBP2    | 3485   | 2.155  | 0.336  |
| IGFBP7    | 3490   | -2.150 | 0.923  |
| IGFBPL1   | 347252 | 1.409  | 2.042  |
| IGHA1     | 3493   | -0.333 | 1.349  |
| IGHG1     | 3500   | 0.376  | -0.356 |
| IGJ       | 3512   | 0.005  | 0.045  |
| IGL@      | 3535   | -0.016 | 0.759  |
| IGSF3     | 3321   | -0.080 | -0.240 |
| ILF3      | 3609   | 0.781  | 1.158  |
| ILKAP     | 80895  | -0.092 | 0.564  |
| IMPDH2    | 3615   | 0.704  | 1.025  |
| IPO4      | 79711  | 0.653  | 1.418  |

|           |        |        |        |
|-----------|--------|--------|--------|
| IPO5      | 3843   | 1.149  | 1.246  |
| IPO9      | 55705  | 0.041  | 0.273  |
| IREB2     | 3658   | 0.487  | -1.434 |
| IRGQ      | 126298 | 0.088  | 0.593  |
| ITFG1     | 81533  | -0.183 | 0.198  |
| ITGA2B    | 3674   | -0.052 | -0.091 |
| ITGB1     | 3688   | 0.217  | -0.789 |
| ITGB2     | 3689   | -0.983 | -1.734 |
| ITGB3     | 3690   | -0.557 | -0.335 |
| ITIH2     | 3698   | -0.204 | -1.139 |
| ITPA      | 3704   | -0.055 | 0.362  |
| ITPR1     | 3708   | 0.703  | 1.984  |
| IVD       | 3712   | 0.065  | 0.139  |
| JAM3      | 83700  | 0.464  | 1.754  |
| JTV1      | 7965   | 1.120  | 0.726  |
| KALRN     | 8997   | 0.085  | 0.727  |
| KARS      | 3735   | 1.315  | 1.426  |
| KBTBD6    | 89890  | 0.069  | 0.379  |
| KHSRP     | 8570   | 0.031  | 0.734  |
| KIAA0152  | 9761   | -0.340 | 0.319  |
| KIAA0329  | 9895   | -0.491 | -1.958 |
| KIAA1576  | 57687  | -0.837 | -1.576 |
| KIAA1967  | 57805  | 0.015  | 0.626  |
| KIDINS220 | 57498  | -0.195 | -0.377 |
| KIF21A    | 55605  | 0.588  | 0.808  |
| KIF5B     | 3799   | 0.196  | -0.102 |
| KIF5C     | 3800   | -0.547 | 0.227  |
| KIFC1     | 3833   | 1.348  | -1.093 |
| KLC1      | 3831   | -0.241 | 0.066  |
| KLHL15    | 80311  | 0.335  | -0.593 |
| KPNA1     | 3836   | 0.200  | -0.372 |
| KPNA4     | 3840   | 0.765  | -0.448 |
| KPNB1     | 3837   | 0.644  | 0.793  |
| KRT10     | 3858   | 0.250  | -1.225 |
| KSR1      | 8844   | -0.356 | -0.586 |
| L1CAM     | 3897   | -0.877 | -1.241 |
| LACTB2    | 51110  | 0.888  | 0.713  |
| LAMA5     | 3911   | 0.054  | 1.382  |
| LAMB1     | 3912   | 0.404  | -0.022 |
| LAMC1     | 3915   | -0.013 | -0.227 |
| LAMP1     | 3916   | -0.832 | 0.533  |
| LANCL1    | 10314  | 0.090  | 0.128  |
| LANCL2    | 55915  | -0.064 | -0.240 |
| LAP3      | 51056  | 1.333  | 1.319  |
| LASP1     | 3927   | -0.226 | -1.099 |
| LCP1      | 3936   | -0.575 | -1.336 |
| LDHB      | 3945   | 1.157  | -0.365 |
| LGALS1    | 3956   | -0.203 | -0.392 |
| LGALS3BP  | 3959   | -0.281 | 2.438  |
| LIG3      | 3980   | 0.498  | -0.381 |
| LIMCH1    | 22998  | 1.534  | 0.586  |
| LIN7C     | 55327  | 0.274  | -0.139 |
| LMAN2L    | 81562  | -0.042 | 0.188  |
| LONP1     | 9361   | 0.866  | 0.830  |
| LPA       | 4018   | -0.738 | -1.100 |
| LPCAT1    | 79888  | -0.179 | 0.533  |
| LRP1      | 4035   | -0.415 | 0.837  |
| LRPPRC    | 10128  | 1.158  | 0.962  |
| LRRC40    | 55631  | -0.013 | -0.638 |
| LRRC47    | 57470  | -0.540 | -0.377 |
| LRRC59    | 55379  | 0.823  | 2.246  |
| LSM4      | 25804  | 1.313  | 0.608  |
| LTA4H     | 4048   | 0.953  | 0.001  |
| LTBP1     | 4052   | -0.481 | 0.707  |
| LTBP2     | 4053   | -0.659 | 0.586  |
| LUC7L2    | 51631  | 0.230  | 1.747  |
| LUM       | 4060   | -0.477 | -0.789 |
| MAD1L1    | 8379   | -0.096 | -0.342 |
| MAP1B     | 4131   | -0.135 | 0.824  |
| MAP2      | 4133   | -0.295 | -1.249 |
| MAP2K4    | 6416   | -0.555 | -1.362 |

|          |        |        |        |
|----------|--------|--------|--------|
| MAPK1    | 5594   | -0.388 | 0.098  |
| MAPK8    | 5599   | 0.014  | 0.418  |
| MAPK8IP3 | 23162  | -0.267 | 0.405  |
| MAPRE1   | 22919  | 0.424  | 0.091  |
| MAPT     | 4137   | -1.566 | -1.126 |
| MAR5     | 54708  | 0.358  | 0.870  |
| MARCKSL1 | 65108  | -0.460 | 0.740  |
| MASP1    | 5648   | -0.187 | -0.652 |
| MASP2    | 10747  | -0.753 | -1.363 |
| MAT2A    | 4144   | -0.108 | 1.200  |
| MAT2B    | 27430  | 0.336  | 1.305  |
| MATR3    | 9782   | 0.351  | 1.026  |
| MCAM     | 4162   | -0.594 | -0.502 |
| MCCC2    | 64087  | -0.057 | 1.406  |
| MCM2     | 4171   | 2.279  | 3.298  |
| MCM3     | 4172   | 1.531  | -1.201 |
| MCM4     | 4173   | 1.173  | 1.780  |
| MCM5     | 4174   | 1.581  | 2.914  |
| MCM6     | 4175   | 1.943  | 3.398  |
| MCM7     | 4176   | 1.030  | 0.990  |
| MCTS1    | 28985  | 1.897  | 1.354  |
| MDH1     | 4190   | 0.495  | 0.397  |
| MDH2     | 4191   | 0.566  | 2.064  |
| MDK      | 4192   | 1.241  | 2.916  |
| MDN1     | 23195  | 0.698  | 2.009  |
| ME2      | 4200   | 0.710  | 1.045  |
| MED12    | 9968   | 0.396  | -0.010 |
| MED20    | 9477   | -0.215 | 1.319  |
| MED8     | 112950 | -0.440 | -1.204 |
| MEMO1    | 51072  | 0.263  | 0.789  |
| MEPCE    | 56257  | 0.255  | -0.044 |
| METAP1   | 23173  | 1.026  | 2.332  |
| METAP2   | 10988  | 0.971  | 0.159  |
| MFN2     | 9927   | -0.955 | -1.391 |
| MGC3207  | 84245  | 0.124  | -0.524 |
| MIF      | 4282   | 0.566  | 1.039  |
| MLLT4    | 4301   | -0.681 | 1.287  |
| MMP2     | 4313   | 0.139  | 0.773  |
| MPO      | 4353   | -0.795 | 1.409  |
| MPP1     | 4354   | 0.125  | -0.882 |
| MPST     | 4357   | 1.366  | 0.831  |
| MRPL3    | 11222  | 1.590  | 0.915  |
| MRPS18A  | 55168  | 0.314  | 0.799  |
| MRPS9    | 64965  | 1.229  | 0.413  |
| MRTO4    | 51154  | 0.449  | 1.804  |
| MSH6     | 2956   | 0.911  | -1.026 |
| MST1     | 4485   | -0.294 | -0.335 |
| MTA1     | 9112   | -0.120 | 1.270  |
| MTAP     | 4507   | 0.352  | 1.392  |
| MTCH2    | 23788  | 0.423  | 2.065  |
| MTHFD1   | 4522   | 0.550  | 0.277  |
| MTMR9    | 66036  | -0.484 | 0.861  |
| MTPN     | 136319 | 1.854  | 0.269  |
| MTX2     | 10651  | 0.316  | 1.074  |
| MTX3     | 345778 | 0.923  | 1.571  |
| MXRA5    | 25878  | -0.031 | 3.269  |
| MYH10    | 4628   | 0.198  | 1.487  |
| MYH9     | 4627   | -0.707 | 0.135  |
| NA       | 57671  | -1.044 | 1.314  |
| NA       | 196515 | -0.384 | 0.494  |
| NAMPT    | 10135  | 0.842  | 1.438  |
| NAPA     | 8775   | -0.067 | 0.149  |
| NARS     | 4677   | 0.597  | 1.799  |
| NASP     | 4678   | 0.205  | 1.212  |
| NAV1     | 89796  | -0.206 | 0.310  |
| NCAM1    | 4684   | -0.369 | -0.363 |
| NCAN     | 1463   | 3.244  | 2.134  |
| NCBP1    | 4686   | 0.234  | 0.768  |
| NCL      | 4691   | 0.528  | 1.799  |
| NDRG1    | 10397  | 0.026  | -0.079 |
| NDUFA10  | 4705   | -0.308 | 1.024  |

|            |        |        |        |
|------------|--------|--------|--------|
| NDUFA4     | 4697   | 0.569  | 0.034  |
| NDUFA8     | 4702   | 1.189  | 2.264  |
| NDUFAB1    | 4706   | 1.367  | 2.747  |
| NDUFB10    | 4716   | 0.737  | -0.450 |
| NDUFB7     | 4713   | 0.119  | 2.159  |
| NDUFS1     | 4719   | 0.082  | 1.222  |
| NDUFS5     | 4725   | 0.340  | 3.165  |
| NDUFS6     | 4726   | 0.424  | 1.732  |
| NDUFV1     | 4723   | 0.360  | 1.734  |
| NEK7       | 140609 | -0.058 | -1.151 |
| NEK9       | 91754  | 0.233  | 1.061  |
| NELL2      | 4753   | 0.109  | 2.908  |
| NFASC      | 23114  | -0.509 | -1.249 |
| NFXL1      | 152518 | 2.333  | 0.898  |
| NHP2L1     | 4809   | 0.364  | 1.945  |
| NIF3L1     | 60491  | 1.140  | 0.843  |
| NIPSNAP1   | 8508   | -0.008 | -0.021 |
| NISCH      | 11188  | -0.316 | 0.255  |
| NIT1       | 4817   | -0.276 | -0.847 |
| NIT2       | 56954  | 1.342  | 1.438  |
| NKRF       | 55922  | 0.310  | 1.305  |
| NLN        | 57486  | 0.113  | -0.080 |
| NMD3       | 51068  | 0.498  | 1.976  |
| NNT        | 23530  | 0.503  | 0.715  |
| NOL5A      | 10528  | -0.556 | 2.064  |
| NOLA2      | 55651  | 0.666  | 2.280  |
| NONO       | 4841   | 0.816  | 1.136  |
| NOP5/NOP58 | 51602  | 1.121  | 1.208  |
| NP         | 4860   | 0.946  | -0.188 |
| NPC2       | 10577  | 0.316  | -0.873 |
| NPEPPS     | 9520   | -0.573 | -0.420 |
| NPM1       | 4869   | 1.897  | 1.846  |
| NPTN       | 27020  | 0.021  | -1.628 |
| NRCAM      | 4897   | -1.487 | -1.634 |
| NRD1       | 4898   | -0.185 | 0.169  |
| NRP1       | 8829   | -1.127 | -2.806 |
| NSD1       | 64324  | -0.036 | 2.754  |
| NSUN2      | 54888  | 0.295  | 0.704  |
| NTRK1      | 4914   | -5.049 | -2.413 |
| NUBP1      | 4682   | 0.247  | -0.221 |
| NUDCD1     | 84955  | 1.347  | 0.805  |
| NUDT15     | 55270  | 1.654  | 0.900  |
| NUDT5      | 11164  | 1.737  | 0.939  |
| NUMA1      | 4926   | -0.622 | 1.973  |
| NUP153     | 9972   | 0.322  | 1.397  |
| NUP155     | 9631   | 0.922  | 0.812  |
| NUP160     | 23279  | 0.305  | 1.278  |
| NUP205     | 23165  | 1.267  | 1.243  |
| NUP35      | 129401 | 1.219  | 0.830  |
| NUP43      | 348995 | 0.654  | 1.252  |
| NUP93      | 9688   | 0.353  | 2.110  |
| NUTF2      | 10204  | 0.358  | -0.176 |
| OGDH       | 4967   | -0.316 | 0.169  |
| OLA1       | 29789  | 0.160  | 0.399  |
| OSBPL11    | 114885 | 0.439  | 2.560  |
| OSBPL1A    | 114876 | 0.453  | 0.886  |
| OSBPL9     | 114883 | -0.252 | -1.080 |
| OTUB1      | 55611  | 0.025  | 0.362  |
| OXA1L      | 5018   | 0.364  | 1.805  |
| OXCT1      | 5019   | -0.019 | 1.550  |
| P4HB       | 5034   | 0.531  | 1.123  |
| PA2G4      | 5036   | 0.947  | 1.045  |
| PABPC1     | 26986  | 0.870  | 1.463  |
| PABPN1     | 8106   | -0.049 | 0.345  |
| PAF1       | 54623  | 0.699  | -0.067 |
| PAFAH1B1   | 5048   | -0.265 | 0.217  |
| PAICS      | 10606  | 1.340  | 2.380  |
| PAIP1      | 10605  | 0.716  | 1.098  |
| PALLD      | 23022  | 0.107  | -0.044 |
| PANK2      | 80025  | 0.846  | -0.893 |
| PARK7      | 11315  | 0.227  | -0.151 |

|         |        |        |        |
|---------|--------|--------|--------|
| PATZ1   | 23598  | 0.193  | 0.240  |
| PBRM1   | 55193  | 0.170  | 2.128  |
| PCBP1   | 5093   | 0.496  | 0.849  |
| PCBP2   | 5094   | 0.180  | 0.623  |
| PCBP3   | 54039  | -0.843 | 0.422  |
| PCCB    | 5096   | 1.214  | 0.590  |
| PCIF1   | 63935  | -0.008 | -1.258 |
| PCMT1   | 5110   | -0.046 | -0.073 |
| PCNA    | 5111   | 2.060  | 3.534  |
| PCOLCE  | 5118   | 1.207  | 3.248  |
| PCYT2   | 5833   | -0.060 | -1.560 |
| PDCD6IP | 10015  | 0.536  | 0.882  |
| PDCL3   | 79031  | 0.702  | 0.098  |
| PDHA1   | 5160   | 0.985  | 1.077  |
| PDIA3   | 2923   | -0.466 | 1.236  |
| PDLIM4  | 8572   | 1.214  | 1.405  |
| PDS5A   | 23244  | 0.487  | 1.869  |
| PDXDC1  | 23042  | -0.315 | 0.713  |
| PDXK    | 8566   | 0.025  | -0.363 |
| PDXP    | 57026  | -0.178 | 0.608  |
| PEBP1   | 5037   | 0.352  | 0.786  |
| PECAM1  | 5175   | -0.562 | -3.256 |
| PEPD    | 5184   | -0.235 | 0.066  |
| PEX11B  | 8799   | -0.241 | 0.707  |
| PF4V1   | 5197   | -0.103 | 0.529  |
| PFAS    | 5198   | 0.981  | 0.979  |
| PFDN5   | 5204   | 0.304  | 1.081  |
| PFKL    | 5211   | -0.772 | -0.434 |
| PFKM    | 5213   | 0.624  | 1.069  |
| PFKP    | 5214   | 0.545  | 0.163  |
| PFN1    | 5216   | 0.134  | 0.623  |
| PFN2    | 5217   | 0.393  | 0.740  |
| PGAM1   | 5223   | -0.012 | 0.034  |
| PGD     | 5226   | -0.415 | -1.010 |
| PGK1    | 5230   | 1.689  | 1.327  |
| PGK2    | 5232   | -0.369 | -2.546 |
| PGLS    | 25796  | -0.016 | 0.861  |
| PGLYRP2 | 114770 | 0.011  | -0.888 |
| PGM1    | 5236   | 0.863  | -6.278 |
| PGM3    | 5238   | 0.685  | -0.981 |
| PGRMC1  | 10857  | 0.564  | 1.895  |
| PHB     | 5245   | 1.015  | 2.069  |
| PHF5A   | 84844  | 1.351  | 1.273  |
| PHF6    | 84295  | 0.615  | 1.558  |
| PHGDH   | 26227  | 3.401  | 1.818  |
| PHIP    | 55023  | 0.302  | -0.201 |
| PHYHIPL | 84457  | 0.039  | -0.079 |
| PI16    | 221476 | -0.221 | -2.095 |
| PIN1    | 5300   | 0.352  | 0.057  |
| PIP5K1C | 23396  | -0.718 | -0.528 |
| PITPNA  | 5306   | -0.416 | 0.217  |
| PITPNB  | 23760  | 0.177  | 0.510  |
| PITPNC1 | 26207  | 0.825  | 1.156  |
| PKM2    | 5315   | 0.641  | 2.117  |
| PLAA    | 9373   | 0.775  | 0.370  |
| PLEC1   | 5339   | -0.940 | -0.502 |
| PLS1    | 5357   | 0.446  | 0.156  |
| PLXNB2  | 23654  | -0.446 | -2.767 |
| PLXNC1  | 10154  | -0.766 | -0.461 |
| PM20D2  | 135293 | 0.728  | -2.573 |
| PML     | 5371   | 0.133  | -0.027 |
| POLD1   | 5424   | 0.429  | 0.651  |
| POR     | 5447   | -0.457 | -1.520 |
| POSTN   | 10631  | -0.461 | 1.754  |
| PPA1    | 5464   | 1.461  | 1.861  |
| PPA2    | 27068  | 1.554  | 2.452  |
| PPAT    | 5471   | 2.322  | 2.802  |
| PPCDC   | 60490  | -0.019 | 0.264  |
| PPIA    | 5478   | 0.582  | 0.950  |
| PPIB    | 5479   | 1.113  | 2.103  |
| PPID    | 5481   | 0.947  | 0.904  |

|         |        |        |        |
|---------|--------|--------|--------|
| PPM1A   | 5494   | 0.830  | -0.711 |
| PPM1E   | 22843  | 0.658  | 0.939  |
| PPM1G   | 5496   | 0.022  | 0.510  |
| PPME1   | 51400  | -0.098 | -0.079 |
| PPP1CA  | 5499   | 0.015  | 0.541  |
| PPP1CB  | 5500   | 0.017  | 0.098  |
| PPP2CA  | 5515   | -0.110 | 0.327  |
| PPP2R1A | 5518   | -0.061 | 0.159  |
| PPP2R5B | 5526   | -0.635 | 0.502  |
| PPP2R5C | 5527   | 0.326  | 0.354  |
| PPP2R5D | 5528   | -0.255 | -1.217 |
| PPP2R5E | 5529   | 0.557  | 1.159  |
| PPP4R2  | 151987 | 0.693  | 1.118  |
| PPP5C   | 5536   | 0.094  | 1.123  |
| PPP6C   | 5537   | 0.702  | 0.818  |
| PPT1    | 5538   | -0.342 | -0.649 |
| PPWD1   | 23398  | 0.495  | 0.573  |
| PRDX2   | 7001   | 0.398  | -0.126 |
| PRDX4   | 10549  | 2.805  | 3.493  |
| PRDX5   | 25824  | 0.417  | 0.945  |
| PRDX6   | 9588   | 0.962  | -1.291 |
| PREP    | 5550   | 0.729  | 0.703  |
| PREPL   | 9581   | -0.152 | -1.209 |
| PRKAR2A | 5576   | -0.062 | -0.823 |
| PRKAR2B | 5577   | -0.399 | -1.482 |
| PRKCA   | 5578   | 0.416  | -0.151 |
| PRKCB   | 5579   | -1.604 | -2.770 |
| PRKCE   | 5581   | -1.291 | -1.468 |
| PRKCI   | 5584   | 0.303  | -0.126 |
| PRKCSH  | 5589   | 0.153  | 1.287  |
| PRKDC   | 5591   | 0.708  | 1.050  |
| PRMT1   | 3276   | 1.055  | 1.564  |
| PRMT5   | 10419  | 1.134  | 0.707  |
| PRNPIP  | 79033  | -0.598 | -0.370 |
| PROS1   | 5627   | 0.099  | 0.405  |
| PRPF3   | 9129   | 1.342  | 1.855  |
| PRPF4B  | 8899   | 0.844  | 1.154  |
| PRPH    | 5630   | -1.550 | -2.810 |
| PRPS1   | 5631   | 1.111  | 0.998  |
| PRPS2   | 5634   | 1.370  | 2.672  |
| PRR6    | 201161 | 0.763  | 1.123  |
| PRSS12  | 8492   | 1.779  | 1.574  |
| PSAP    | 5660   | -1.215 | -0.163 |
| PSAT1   | 29968  | 1.012  | 0.549  |
| PSMA1   | 5682   | 0.845  | 0.719  |
| PSMA5   | 5686   | 0.160  | 0.369  |
| PSMA6   | 5687   | 1.287  | 1.203  |
| PSMA7   | 5688   | 0.680  | 2.364  |
| PSMB1   | 5689   | 0.654  | 1.259  |
| PSMB3   | 5691   | 0.269  | 0.113  |
| PSMC3   | 5702   | 0.425  | -1.204 |
| PSMC4   | 5704   | 0.162  | 0.023  |
| PSMC5   | 5705   | 0.297  | 0.181  |
| PSMD1   | 5707   | 0.098  | 0.586  |
| PSMD11  | 5717   | -0.445 | 0.077  |
| PSMD12  | 5718   | 0.955  | 0.219  |
| PSMD2   | 5708   | 0.273  | 0.446  |
| PSMD4   | 5710   | 0.304  | -0.079 |
| PSMD6   | 9861   | 0.213  | 0.371  |
| PSMD9   | 5715   | 0.013  | 0.034  |
| PSME1   | 5720   | 0.141  | -0.176 |
| PSME4   | 23198  | 0.548  | -0.489 |
| PSPC1   | 55269  | 0.365  | 0.837  |
| PSPH    | 5723   | -0.270 | 0.345  |
| PTBP1   | 5725   | 1.598  | 3.036  |
| PTGES3  | 10728  | -0.073 | 0.720  |
| PTK7    | 5754   | 0.217  | 0.984  |
| PTN     | 5764   | -0.290 | 1.149  |
| PTPN1   | 5770   | 0.018  | 0.422  |
| PTPN11  | 5781   | 0.047  | 1.614  |
| PTPN23  | 25930  | -0.314 | 0.219  |

|          |        |        |        |
|----------|--------|--------|--------|
| PUF60    | 22827  | 0.203  | 1.193  |
| PURB     | 5814   | 0.132  | 0.118  |
| PVRL1    | 5818   | -0.063 | -0.981 |
| PYCR1    | 5831   | 0.624  | 1.909  |
| PYGB     | 5834   | -0.400 | -1.475 |
| PZP      | 5858   | 0.043  | 0.193  |
| QARS     | 5859   | 0.013  | -0.321 |
| QDPR     | 5860   | -0.086 | -0.335 |
| QSOX1    | 5768   | -0.040 | 2.523  |
| RAB10    | 10890  | -0.086 | -0.044 |
| RAB14    | 51552  | 0.105  | -0.240 |
| RAB18    | 22931  | -0.145 | 0.454  |
| RAB21    | 23011  | -0.055 | 0.354  |
| RAB22A   | 57403  | 0.053  | 0.760  |
| RAB2B    | 84932  | 0.052  | 0.601  |
| RAB3GAP1 | 22930  | 0.048  | 0.310  |
| RAB7A    | 7879   | -0.005 | 1.169  |
| RABGAP1  | 23637  | -0.160 | 0.487  |
| RABGGTA  | 5875   | 0.185  | -0.114 |
| RABL4    | 11020  | -0.367 | -0.092 |
| RAC1     | 5879   | 0.278  | 0.461  |
| RAD21    | 5885   | 0.372  | 2.205  |
| RAN      | 5901   | 0.959  | 0.786  |
| RANBP1   | 5902   | 0.642  | 1.026  |
| RANBP2   | 5903   | 0.232  | 1.169  |
| RANBP9   | 10048  | 0.208  | 0.178  |
| RANGAP1  | 5905   | -0.557 | -0.079 |
| RAP1B    | 5908   | -0.034 | -0.406 |
| RAP1GDS1 | 5910   | 0.377  | 0.082  |
| RARS     | 5917   | 0.068  | -1.963 |
| RASA1    | 5921   | 0.130  | 0.076  |
| RBBP4    | 5928   | 0.547  | 1.506  |
| RBM17    | 84991  | 0.492  | 1.434  |
| RBM39    | 9584   | 0.439  | 1.266  |
| RBM4     | 5936   | 0.742  | 0.805  |
| RBM42    | 79171  | 0.029  | 1.217  |
| RBP1     | 5947   | -1.333 | 1.413  |
| RCC1     | 1104   | 1.098  | 2.087  |
| RCC2     | 55920  | 0.016  | 1.585  |
| RDH13    | 112724 | 0.100  | 0.541  |
| RECQL    | 5965   | 0.769  | 1.226  |
| RELA     | 5970   | 0.349  | 0.550  |
| RFTN1    | 23180  | -0.607 | -1.317 |
| RG9MTD1  | 54931  | 1.043  | 1.349  |
| RHOA     | 387    | 0.620  | 0.904  |
| RHOB     | 388    | -0.753 | -1.136 |
| RING1    | 6015   | -0.289 | 0.264  |
| RNASE1   | 6035   | 1.003  | 2.212  |
| RNASE4   | 6038   | -0.129 | 1.718  |
| RNASEH2A | 10535  | 1.886  | 0.805  |
| RNASET2  | 8635   | 0.007  | 0.463  |
| RNF114   | 55905  | 0.993  | 0.747  |
| RNH1     | 6050   | -0.631 | -0.293 |
| RNPEP    | 6051   | 0.382  | 0.255  |
| ROCK2    | 9475   | 0.498  | -0.930 |
| ROD1     | 9991   | -0.746 | -0.981 |
| RPA1     | 6117   | 0.319  | 0.077  |
| RPIA     | 22934  | 0.826  | -0.126 |
| RPL10    | 6134   | 0.335  | 1.545  |
| RPL10A   | 4736   | 0.680  | 2.384  |
| RPL11    | 6135   | 0.328  | 1.762  |
| RPL12    | 6136   | 1.008  | 1.469  |
| RPL14    | 9045   | 1.001  | 2.111  |
| RPL17    | 6139   | 0.669  | 0.549  |
| RPL18A   | 6142   | 0.938  | 2.061  |
| RPL23    | 9349   | 0.103  | 1.947  |
| RPL27A   | 6157   | 0.698  | 1.050  |
| RPL3     | 6122   | 0.526  | 1.770  |
| RPL30    | 6156   | 0.426  | 2.284  |
| RPL32    | 6161   | 0.766  | 2.103  |
| RPL34    | 6164   | 0.528  | 2.020  |



|          |       |        |        |
|----------|-------|--------|--------|
| RPL4     | 6124  | 0.696  | 0.967  |
| RPL5     | 6125  | 0.180  | 1.183  |
| RPL7A    | 6130  | 0.956  | 1.637  |
| RPL9     | 6133  | 0.437  | 1.103  |
| RPLP0    | 6175  | 0.614  | 2.061  |
| RPN1     | 6184  | 0.221  | 1.047  |
| RPS11    | 6205  | 0.813  | 0.518  |
| RPS16    | 6217  | 0.716  | 0.623  |
| RPS17    | 6218  | 0.962  | 1.626  |
| RPS2     | 6187  | 0.734  | 1.747  |
| RPS21    | 6227  | 1.181  | 1.349  |
| RPS27L   | 51065 | 1.896  | 1.154  |
| RPS28    | 6234  | 0.145  | 3.062  |
| RPS3     | 6188  | 0.966  | 1.532  |
| RPS3A    | 6189  | 0.549  | 1.627  |
| RPS4X    | 6191  | 0.531  | 1.700  |
| RPS4Y1   | 6192  | 4.531  | 3.262  |
| RPS5     | 6193  | 1.017  | 1.665  |
| RPS6     | 6194  | 0.840  | 1.178  |
| RPS8     | 6202  | 0.354  | 2.026  |
| RPSA     | 3921  | 0.911  | 1.250  |
| RRM1     | 6240  | 1.773  | 2.156  |
| RRM2     | 6241  | 3.085  | 1.471  |
| RRP1     | 8568  | -0.074 | 0.020  |
| RRP1B    | 23076 | 0.581  | 0.960  |
| RSF1     | 51773 | 0.347  | 0.487  |
| RSL1D1   | 26156 | 1.353  | 1.603  |
| RTN4     | 57142 | -0.149 | 0.818  |
| RUVBL1   | 8607  | 1.334  | 0.679  |
| RUVBL2   | 10856 | 1.221  | 0.793  |
| SAE1     | 10055 | 0.679  | 0.930  |
| SAFB     | 6294  | 0.425  | 1.128  |
| SAFB2    | 9667  | 0.430  | 0.549  |
| SAMHD1   | 25939 | 0.012  | 0.001  |
| SAMM50   | 25813 | 0.838  | 0.397  |
| SAPS2    | 9701  | -0.853 | -0.240 |
| SARM1    | 23098 | -0.644 | -0.528 |
| SARS     | 6301  | 0.769  | 1.471  |
| SART1    | 9092  | 0.685  | 2.409  |
| SART3    | 9733  | 0.180  | 0.620  |
| SBF1     | 6305  | -0.660 | -1.151 |
| SBF2     | 81846 | 0.167  | 0.593  |
| SCARB2   | 950   | 0.166  | 2.191  |
| SCFD1    | 23256 | 0.523  | 0.178  |
| SCLY     | 51540 | -0.223 | -0.446 |
| SCRN1    | 9805  | -1.008 | -0.761 |
| SDCCAG10 | 10283 | 0.413  | 1.188  |
| SDHA     | 6389  | 0.303  | 1.118  |
| SDHB     | 6390  | -0.404 | 0.371  |
| SEC13    | 6396  | 0.417  | 0.895  |
| SEC23IP  | 11196 | -0.218 | 0.273  |
| SEC24A   | 10802 | 0.560  | 0.283  |
| SEC24B   | 10427 | 1.341  | 0.904  |
| SEC24C   | 9632  | -0.342 | 0.166  |
| SEC31A   | 22872 | 0.674  | 0.874  |
| SEC63    | 11231 | -0.487 | -0.119 |
| SEL1L    | 6400  | 0.174  | -0.067 |
| SELENBP1 | 8991  | 0.076  | -0.832 |
| SELL     | 6402  | -0.065 | -1.014 |
| SEMA4C   | 54910 | -0.190 | -1.273 |
| SEMA4D   | 10507 | -0.291 | -4.206 |
| SEMA7A   | 8482  | -0.058 | 0.354  |
| SEP15    | 9403  | 0.969  | 0.502  |
| SEP2     | 4735  | 0.352  | 2.543  |
| SEP5     | 5413  | -0.912 | 0.630  |
| SEP7     | 989   | 0.096  | 1.623  |
| SERPINA1 | 5265  | -0.734 | 0.198  |
| SERPINF1 | 5176  | 2.758  | 1.670  |
| SERPINF2 | 5345  | 0.116  | -0.676 |
| SERPING1 | 710   | 0.221  | -0.010 |
| SF1      | 7536  | 0.228  | 1.113  |

|          |        |        |        |
|----------|--------|--------|--------|
| SF3A1    | 10291  | 0.090  | 1.310  |
| SF3A2    | 8175   | 0.276  | 1.183  |
| SF3B1    | 23451  | -0.116 | 0.979  |
| SFPQ     | 6421   | 0.016  | 1.174  |
| SFRS1    | 6426   | 0.824  | 1.522  |
| SFRS7    | 6432   | 0.397  | 1.371  |
| SGSH     | 6448   | -0.481 | -0.863 |
| SGTA     | 6449   | 0.479  | 0.734  |
| SH2D3C   | 10044  | -0.162 | 0.139  |
| SHMT1    | 6470   | 0.069  | 0.963  |
| SKP1     | 6500   | 0.186  | 0.118  |
| SLC25A12 | 8604   | -0.154 | 1.220  |
| SLC25A24 | 29957  | -0.069 | 1.140  |
| SLC25A4  | 291    | -0.075 | 1.560  |
| SLC25A5  | 292    | 1.772  | 1.462  |
| SLC44A2  | 57153  | -0.725 | 1.003  |
| SLIT2    | 9353   | 0.015  | 1.111  |
| SMAD2    | 4087   | 0.409  | 0.824  |
| SMAD4    | 4089   | 0.281  | 0.963  |
| SMARCA1  | 6594   | 0.082  | 0.799  |
| SMARCC2  | 6601   | -0.474 | 0.737  |
| SMC1A    | 8243   | -0.329 | 1.670  |
| SMC3     | 9126   | 0.195  | -0.261 |
| SMC4     | 10051  | 2.940  | 2.639  |
| SNRPB    | 6628   | 1.538  | 2.015  |
| SNRPD2   | 6633   | 1.824  | 1.820  |
| SNRPD3   | 6634   | 0.848  | 0.064  |
| SNX6     | 58533  | 0.756  | 0.236  |
| SOD1     | 6647   | 0.389  | 0.159  |
| SON      | 6651   | 0.169  | 1.274  |
| SORD     | 6652   | 1.212  | 0.760  |
| SORL1    | 6653   | -0.780 | -0.406 |
| SORT1    | 6272   | -0.001 | 1.288  |
| SPARC    | 6678   | -3.876 | 1.648  |
| SPCS2    | 9789   | 0.457  | 0.899  |
| SPIN1    | 10927  | 0.242  | 1.502  |
| SPTA1    | 6708   | -0.143 | -0.767 |
| SPTAN1   | 6709   | -0.420 | 1.747  |
| SPTB     | 6710   | -0.203 | -0.883 |
| SPTBN1   | 6711   | -0.284 | -0.281 |
| SPTBN2   | 6712   | -0.541 | -0.593 |
| SPTLC2   | 9517   | 0.201  | -1.764 |
| SR140    | 23350  | 1.435  | 1.050  |
| SRC      | 6714   | -0.218 | 0.192  |
| SRGAP3   | 9901   | -0.613 | -0.556 |
| SRI      | 6717   | 0.362  | 0.537  |
| SRM      | 6723   | 0.122  | 1.426  |
| SRP19    | 6728   | 0.601  | 1.198  |
| SRP68    | 6730   | 0.577  | 0.630  |
| SRP72    | 6731   | 0.791  | 0.734  |
| SRP9     | 6726   | 0.469  | 1.327  |
| SRPRB    | 58477  | 0.615  | 1.203  |
| SRR      | 63826  | -0.020 | -0.920 |
| SSB      | 6741   | 0.794  | 0.675  |
| SSRP1    | 6749   | 0.939  | 3.541  |
| SSU72    | 29101  | -0.201 | -0.050 |
| ST13     | 6767   | 0.706  | 0.454  |
| STAG2    | 10735  | 1.522  | 0.661  |
| STAM     | 8027   | 0.139  | -0.328 |
| STIP1    | 10963  | 0.619  | 0.164  |
| STK10    | 6793   | 0.133  | -1.879 |
| STK24    | 8428   | 0.114  | 0.796  |
| STK39    | 27347  | 0.246  | 0.128  |
| STOM     | 2040   | -0.341 | -0.010 |
| STON2    | 85439  | 0.074  | 0.734  |
| STRAP    | 11171  | 0.150  | 0.454  |
| STRN4    | 29888  | -0.301 | -0.579 |
| STT3A    | 3703   | 1.134  | 1.113  |
| STT3B    | 201595 | 0.239  | -2.887 |
| STX12    | 23673  | -1.135 | -1.722 |
| STXBP1   | 6812   | -0.434 | -0.488 |

|          |        |        |        |
|----------|--------|--------|--------|
| SUCLA2   | 8803   | 0.371  | 0.188  |
| SUCLG1   | 8802   | 0.099  | 0.255  |
| SUGT1    | 10910  | 0.573  | 0.861  |
| SUPT16H  | 11198  | 0.406  | 1.921  |
| SUPT6H   | 6830   | -0.754 | 0.413  |
| SYNCRIP  | 10492  | 1.155  | 1.418  |
| SYNE2    | 23224  | 0.058  | 1.310  |
| SYP      | 6855   | -0.345 | -0.280 |
| TAGLN2   | 8407   | -0.537 | -1.560 |
| TALDO1   | 6888   | 0.622  | 0.255  |
| TANC2    | 26115  | 0.051  | 0.574  |
| TAKO2    | 9344   | -0.047 | 0.159  |
| TARDBP   | 23435  | 0.302  | 0.990  |
| TATDN1   | 83940  | 1.131  | 1.522  |
| TBC1D1   | 23216  | 0.078  | 0.181  |
| TBC1D13  | 54662  | -0.103 | 1.796  |
| TBC1D15  | 64786  | 0.525  | 2.541  |
| TBC1D24  | 57465  | -0.190 | 0.164  |
| TBC1D5   | 9779   | 0.736  | 1.651  |
| TBCB     | 1155   | -0.046 | 0.292  |
| TBCC     | 6903   | 0.011  | 0.217  |
| TCEA1    | 6917   | 0.049  | 1.450  |
| TCEB1    | 6921   | 0.805  | 0.494  |
| TCEB2    | 6923   | 0.450  | 0.533  |
| TCERG1   | 10915  | 0.259  | 0.973  |
| TCP1     | 6950   | 0.830  | 0.471  |
| TDRKH    | 11022  | -0.050 | -0.314 |
| TES      | 26136  | 1.459  | 1.635  |
| TF       | 7018   | -0.848 | -0.044 |
| TFAP2B   | 7021   | -0.285 | 1.358  |
| TFRC     | 7037   | 2.362  | 2.560  |
| TGFB111  | 7041   | 0.627  | -1.190 |
| TGFBI    | 7045   | -0.286 | 0.586  |
| TGM2     | 7052   | -0.280 | -1.441 |
| TH       | 7054   | -0.741 | -0.293 |
| THBS1    | 7057   | -0.570 | 0.529  |
| THBS2    | 7058   | 0.509  | 0.962  |
| THBS4    | 7060   | 0.557  | 1.098  |
| THOC2    | 57187  | 1.134  | 1.296  |
| THOC6    | 79228  | 0.966  | 1.962  |
| THOP1    | 7064   | 1.001  | 1.164  |
| THSD7A   | 221981 | -0.782 | -0.441 |
| THUMPD1  | 55623  | 0.936  | 1.260  |
| THY1     | 7070   | -0.450 | -0.528 |
| TIMM9    | 26520  | 1.903  | 3.169  |
| TIMP2    | 7077   | -0.015 | 0.615  |
| TKT      | 7086   | 1.484  | 1.128  |
| TLE1     | 7088   | 0.176  | 0.602  |
| TLE3     | 7090   | 0.404  | 3.264  |
| TLN1     | 7094   | -0.178 | -0.114 |
| TLN2     | 83660  | -1.760 | -1.573 |
| TM9SF2   | 9375   | -0.004 | 1.323  |
| TM9SF3   | 56889  | 0.262  | 0.990  |
| TMED9    | 54732  | -0.585 | 0.127  |
| TMEM132A | 54972  | -0.655 | 0.630  |
| TMEM31   | 203562 | 0.074  | -1.498 |
| TMPO     | 7112   | 0.641  | 2.262  |
| TNC      | 3371   | -0.685 | -1.461 |
| TNKS1BP1 | 85456  | -0.049 | 1.271  |
| TNPO1    | 3842   | 0.658  | 1.208  |
| TNPO3    | 23534  | 0.138  | 0.556  |
| TOMM70A  | 9868   | 0.928  | 1.362  |
| TOP1     | 7150   | 0.334  | 1.821  |
| TP53BP1  | 7158   | 0.247  | -0.335 |
| TP11     | 7167   | 0.788  | 0.909  |
| TPM2     | 7169   | -0.907 | 1.045  |
| TPP2     | 7174   | 0.999  | 0.430  |
| TPPP     | 11076  | -1.316 | -0.067 |
| TPPP3    | 51673  | -1.693 | -3.217 |
| TRAP1    | 10131  | 1.831  | 2.309  |
| TRAPPC10 | 7109   | -0.324 | 0.142  |

|         |        |        |        |
|---------|--------|--------|--------|
| TRAPPC4 | 51399  | -0.079 | -1.069 |
| TRIAP1  | 51499  | 1.688  | 2.038  |
| TRIM28  | 10155  | 0.744  | 0.727  |
| TRIO    | 7204   | -0.019 | 3.165  |
| TRIP12  | 9320   | 0.496  | 1.283  |
| TRMT1   | 55621  | 1.037  | 1.659  |
| TROVE2  | 6738   | 0.443  | -1.818 |
| TSFM    | 10102  | 0.476  | 1.683  |
| TSPAN18 | 90139  | 0.656  | 0.413  |
| TSTA3   | 7264   | -0.031 | -3.106 |
| TTL12   | 23170  | 0.772  | 0.765  |
| TUBA1A  | 7846   | -0.246 | -0.873 |
| TUBA3C  | 7278   | -0.287 | -1.100 |
| TUBA4A  | 7277   | -0.991 | -0.488 |
| TUBB    | 203068 | -0.145 | -1.343 |
| TUBG1   | 7283   | -0.141 | 1.187  |
| TUFM    | 7284   | 0.272  | 1.260  |
| TXN     | 7295   | 1.777  | 1.336  |
| TXNDC1  | 81542  | 0.939  | -0.551 |
| TXNDC17 | 84817  | 0.388  | -0.962 |
| TXNDC4  | 23071  | 0.059  | 0.714  |
| TXNDC5  | 81567  | 0.458  | 1.374  |
| TXNRD2  | 10587  | -0.421 | 0.601  |
| TYMP    | 1890   | -0.566 | -1.000 |
| U2AF2   | 11338  | 0.468  | 0.345  |
| UBA1    | 7317   | -0.203 | 0.310  |
| UBA2    | 10054  | 0.429  | 1.422  |
| UBA3    | 9039   | 0.261  | 0.936  |
| UBE2F   | 140739 | 0.174  | 0.397  |
| UBE2K   | 3093   | 0.299  | 0.763  |
| UBE2L3  | 7332   | 0.182  | 0.465  |
| UBE2M   | 9040   | 0.403  | 1.181  |
| UBE2O   | 63893  | 0.055  | 0.246  |
| UBE2Z   | 65264  | -0.228 | 0.547  |
| UBE3A   | 7337   | 0.457  | 0.243  |
| UBQLN4  | 56893  | -0.198 | -0.215 |
| UBR1    | 197131 | 0.234  | -0.178 |
| UBR4    | 23352  | -0.498 | 0.056  |
| UBR5    | 51366  | 0.301  | 1.082  |
| UBR7    | 55148  | 1.357  | -0.607 |
| UBTF    | 7343   | -0.371 | 1.149  |
| UCHL1   | 7345   | -0.208 | 0.001  |
| UFC1    | 51506  | 0.371  | -0.810 |
| UGCGL1  | 56886  | -0.131 | 0.288  |
| UHRF1   | 29128  | 2.361  | 2.107  |
| UIMC1   | 51720  | 0.029  | 1.451  |
| UNC5C   | 8633   | 0.197  | 0.663  |
| UNK     | 85451  | -0.066 | 0.767  |
| UQCRC1  | 7384   | 0.583  | 1.514  |
| UQCRH   | 7388   | 0.348  | 1.484  |
| UROD    | 7389   | -0.601 | -1.427 |
| USO1    | 8615   | 0.938  | 0.149  |
| USP14   | 9097   | 0.171  | -0.110 |
| USP15   | 9958   | -0.019 | -0.293 |
| USP24   | 23358  | -0.089 | 0.292  |
| USP47   | 55031  | 0.464  | 0.454  |
| USP7    | 7874   | 0.517  | 0.971  |
| USP9X   | 8239   | 0.114  | -0.091 |
| VARS    | 7407   | 0.242  | 0.430  |
| VAT1    | 10493  | -1.297 | -1.475 |
| VBP1    | 7411   | 1.389  | 1.208  |
| VCAM1   | 7412   | -1.796 | -0.604 |
| VCAN    | 1462   | 2.446  | 2.338  |
| VCL     | 7414   | -0.406 | -0.503 |
| VCP     | 7415   | 0.053  | 0.034  |
| VDAC1   | 7416   | 0.899  | 2.207  |
| VDAC2   | 7417   | 0.860  | 0.364  |
| VDAC3   | 7419   | 0.538  | 1.305  |
| VEZF1   | 7716   | 0.587  | 0.720  |
| VLDLR   | 7436   | 1.353  | 0.554  |
| VPRBP   | 9730   | -0.044 | 0.044  |

|          |        |        |        |
|----------|--------|--------|--------|
| VPS13C   | 54832  | -0.847 | 0.354  |
| VPS28    | 51160  | -0.664 | 0.502  |
| VPS29    | 51699  | -0.090 | 0.962  |
| VPS35    | 55737  | 0.411  | -0.789 |
| VSNL1    | 7447   | 1.404  | 2.405  |
| VTA1     | 51534  | 0.436  | 0.405  |
| VTN      | 7448   | -0.507 | -0.377 |
| VWF      | 7450   | -0.250 | -0.722 |
| WARS     | 7453   | -0.370 | 0.310  |
| WASF1    | 8936   | 0.560  | 0.665  |
| WDFY1    | 57590  | -0.026 | 0.273  |
| WDHD1    | 11169  | 0.598  | 2.484  |
| WDR1     | 9948   | 0.145  | 0.188  |
| WDR22    | 8816   | 0.082  | 0.281  |
| WDR46    | 9277   | 0.573  | 0.330  |
| WDR47    | 22911  | -0.114 | -0.085 |
| WDR5     | 11091  | 0.506  | 1.522  |
| WDR68    | 10238  | 0.107  | 1.604  |
| WDR76    | 79968  | 0.732  | -0.242 |
| WDR77    | 79084  | 0.287  | 0.651  |
| WDR82    | 80335  | 0.261  | 1.050  |
| WDR92    | 116143 | -0.199 | 3.685  |
| WNK1     | 65125  | -0.297 | -0.903 |
| WRNIP1   | 56897  | 0.224  | 0.637  |
| XAB2     | 56949  | 0.578  | 0.132  |
| XPO1     | 7514   | 0.266  | 0.909  |
| XPO7     | 23039  | -0.055 | -0.061 |
| XRCC1    | 7515   | 0.605  | 1.342  |
| XRCC5    | 7520   | 0.648  | 0.861  |
| XRCC6    | 2547   | -0.276 | 1.098  |
| YARS     | 8565   | -0.180 | -3.434 |
| YWHAE    | 7531   | -0.150 | 0.767  |
| YWHAG    | 7532   | -0.188 | 0.454  |
| YWHAH    | 7533   | -0.368 | -0.214 |
| YWHAQ    | 10971  | -0.073 | 0.118  |
| YWHAZ    | 7534   | -0.183 | 0.127  |
| ZC3HAV1  | 56829  | -0.323 | 1.058  |
| ZC3HAV1L | 92092  | 0.153  | 0.893  |
| ZCCHC3   | 85364  | 0.375  | 0.720  |
| ZFHX3    | 463    | -0.193 | 2.045  |
| ZFR      | 51663  | 0.291  | 1.055  |
| ZFYVE20  | 64145  | 0.172  | 0.340  |
| ZFYVE9   | 9372   | -0.424 | -0.055 |
| ZMIZ1    | 57178  | -0.534 | 0.340  |
| ZNF10    | 7556   | 0.059  | -1.539 |
| ZNF280C  | 55609  | 1.750  | 1.521  |
| ZNF292   | 23036  | 0.442  | 0.947  |
| ZNF295   | 49854  | 1.235  | -0.490 |
| ZNF428   | 126299 | -0.617 | 0.016  |
| ZNF462   | 58499  | 0.253  | 0.226  |
| ZNF512   | 84450  | 0.041  | 1.020  |
| ZRANB2   | 9406   | 0.361  | 0.045  |
| ZYX      | 7791   | -0.309 | -0.448 |

---
